# Supplementary material for: Community social capital and the onset of functional disability among older adults in Japan: a multilevel longitudinal study using Japan Gerontological Evaluation Study (JAGES) data
Source: PubMed Central journal article supplement (PMC6797418; doi:10.1136/bmjopen-2019-029279), 2019-10-08
Supplement: bmjopen-2019-029279.draft_revisions.pdf [file bmjopen-2019-029279.draft_revisions.pdf]

# BMJ Open

BMJ Open is committed to open peer review. As part of this commitment we make the peer review history of every article we publish publicly available.

When an article is published we post the peer reviewers' comments and the authors' responses online. We also post the versions of the paper that were used during peer review. These are the versions that the peer review comments apply to.

The versions of the paper that follow are the versions that were submitted during the peer review process. They are not the versions of record or the final published versions. They should not be cited or distributed as the published version of this manuscript.

BMJ Open is an open access journal and the full, final, typeset and author-corrected version of record of the manuscript is available on our site with no access controls, subscription charges or pay-per-view fees (<http://bmjopen.bmj.com>).

If you have any questions on BMJ Open's open peer review process please email [info.bmjopen@bmj.com](mailto:info.bmjopen@bmj.com)

# BMJ Open

## Community social capital and the onset of functional disability among older adults in Japan: A multilevel longitudinal study using Japan Gerontological Evaluation Study (JAGES) data

|                               |                                                                                                                                                                                                                                                                                                                                                                               |
|-------------------------------|-------------------------------------------------------------------------------------------------------------------------------------------------------------------------------------------------------------------------------------------------------------------------------------------------------------------------------------------------------------------------------|
| Journal:                      | <i>BMJ Open</i>                                                                                                                                                                                                                                                                                                                                                               |
| Manuscript ID                 | bmjopen-2019-029279                                                                                                                                                                                                                                                                                                                                                           |
| Article Type:                 | Research                                                                                                                                                                                                                                                                                                                                                                      |
| Date Submitted by the Author: | 20-Jan-2019                                                                                                                                                                                                                                                                                                                                                                   |
| Complete List of Authors:     | Noguchi, Taiji; Nagoya City University, Department of Public Health<br>Kondo, Katsunori; Chiba University, Center for Preventive Medical Science<br>Saito, Masashige; Nihonfukushi University, Faculty of Social Welfare<br>Nakagawa-Senda, Hiroko; Nagoya City University, Department of Public Health<br>Suzuki, Sadao; Nagoya City University, Department of Public Helath |
| Keywords:                     | PUBLIC HEALTH, EPIDEMIOLOGY, GERIATRIC MEDICINE, SOCIAL MEDICINE                                                                                                                                                                                                                                                                                                              |
|                               |                                                                                                                                                                                                                                                                                                                                                                               |

SCHOLARONE™  
Manuscripts

1  
2  
3  
4  
5  
6  
7 1 **Community social capital and the onset of functional disability among older adults in**  
8  
9 2 **Japan: A multilevel longitudinal study using Japan Gerontological Evaluation Study**  
10  
11  
12 3 **(JAGES) data**  
13  
14

15 4  
16  
17  
18 5 Taiji Noguchi<sup>1</sup>, Katsunori Kondo<sup>2,3</sup>, Masashige Saito<sup>4</sup>, Hiroko Nakagawa-Senda<sup>1</sup>, Sadao  
19  
20  
21 6 Suzuki<sup>1</sup>  
22  
23

24 7

25  
26  
27 8 **Author affiliations**  
28

29  
30 9 <sup>1</sup>Department of Public Health, Nagoya City University Graduate School of Medical  
31  
32  
33 10 Sciences, Aichi, Japan  
34

35  
36 11 <sup>2</sup>Center for Preventive Medical Sciences, Chiba University, Chiba, Japan  
37

38  
39 12 <sup>3</sup>Center for Gerontology and Social Science, National Center for Geriatrics and  
40  
41  
42 13 Gerontology, Aichi, Japan  
43

44  
45 14 <sup>4</sup>Department of Social Welfare, Nihon Fukushi University, Aichi, Japan  
46

47  
48 15

49  
50  
51 16 **Corresponding author:**  
52

53  
54 17 Sadao Suzuki, MD, PhD  
55

56  
57 18 Department of Public Health  
58  
59  
60

1  
2  
3  
4  
5  
6  
7 19 Nagoya City University Graduate School of Medical Sciences

8  
9 20 1 Kawasumi, Mizuho-cho, Mizuho-ku, Nagoya, Aichi 467-8601, Japan

10  
11  
12 21 e-mail: ssuzuki@med.nagoya-cu.ac.jp

13  
14  
15 22 Tel: +81-52-853-8176, +81-52-853-8177

16  
17  
18 23 Fax : +81-52-842-3830

19  
20  
21  
22 24

23  
24 25 **Abstract (256 words)**

25  
26  
27 26 **Objective:**

28  
29  
30 27 The present study examined the association between community social capital and the  
31  
32  
33 28 onset of functional disability among older Japanese people by using validated indicators  
34  
35  
36 29 of social capital and a prospective multilevel analysis design.

37  
38  
39 30 **Design:**

40  
41  
42 31 Prospective cohort study

43  
44  
45 32 **Setting:**

46  
47  
48 33 We utilized data from the Japan Gerontological Evaluation Study (JAGES), established  
49  
50  
51 34 from August 2010 to January 2012 in 323 districts.

52  
53  
54 35 **Participants:**

55  
56  
57 36 The target population was restricted to non-institutionalized people aged 65 years or  
58  
59  
60

1  
2  
3  
4  
5  
6 37 older who were independent in activities of daily living. Participants included 73,021  
7  
8  
9 38 people (34,051 men and 38,970 women) who were followed up over a 3-year period.

10  
11  
12 39 **Primary outcome measure:**

13  
14  
15 40 The primary outcome measure was the onset of functional disability, defined as a new  
16  
17  
18 41 registration in public long-term care insurance (LTCI) system records with a care-needs  
19  
20  
21 42 level of two or above, analysed with multilevel Cox proportional hazards regression  
22  
23  
24 43 models by community social capital (civic participation, social cohesion, and reciprocity).

25  
26  
27 44 **Results:**

28  
29  
30 45 The mean age of participants was 73.3 years (SD = 6.0) for men and 73.8 years (SD =  
31  
32  
33 46 6.2) for women. During the study period, the onset of functional disability occurred in  
34  
35  
36 47 1465 (4.3%) men and 1519 (3.9%) women. Of three community social capital variables,  
37  
38  
39 48 social cohesion significantly reduced the risk of onset of functional disability (hazard  
40  
41  
42 49 ratio = 0.910; 95% CI: 0.830–0.998) among men, after adjusting for individual social and  
43  
44  
45 50 behavioral variables. There was no significant effect among women.

46  
47  
48 51 **Conclusions:**

49  
50  
51 52 Living in a community with rich social cohesion is associated with a lower incidence of  
52  
53  
54 53 onset of functional disability among older Japanese men.

55  
56  
57 54  
58  
59  
60

## 55 **Strengths and limitations of this study**

- 56 · This is the first prospective cohort study to examine the association between  
57 community social capital and the onset of functional disability among older people,  
58 by a large, nationwide population-based Japanese sample.
- 59 · To measure community social capital, an indicator consisting of validated  
60 multidimensional items was used, and we assessed these components of community  
61 social capital (civic participation, social cohesion, and reciprocity).
- 62 · Multilevel survival analysis was used to examine community contextual  
63 characteristics for the onset of functional disability.
- 64 · More than 73,000 people aged 65 years or older participated and were followed up for  
65 3 years period.
- 66 · While this study was a large sample size, the measurements were self-reported data.

67  
68 **Word count: 3,023 words**

## 70 **INTRODUCTION**

71 In almost every country, the proportion of older people is growing at an increasing  
72 rate,[1] and Japan has displayed the fastest growth. In 2012, 32% of the Japanese

1  
2  
3  
4  
5  
6 73 population was aged over 60 years, and this is expected to rise to 42% by 2050.[2] Age-  
7  
8  
9 74 related functional disability, defined as difficulty performing activities of daily living, is  
10  
11  
12 75 a very important public health issue worldwide.[3, 4] Because functional disability  
13  
14  
15 76 affects health status and the costs of long-term care,[4] the prevention of functional  
16  
17  
18 77 disability among older people is increasingly important.

21 78         Recently, there have been great efforts to research the effect of social capital on  
22  
23  
24 79 health.[5-13] Putnam defines social capital as “features of social organization, such trust,  
25  
26  
27 80 norms and networks that can improve the efficiency of society by facilitating coordinated  
28  
29  
30 81 actions.”[5] There is considerable evidence of associations between social capital and  
31  
32  
33 82 various health indicators.[6-12] Although both ecologic and individual-level studies of  
34  
35  
36 83 social capital have yielded important insight, an appropriate examination of social  
37  
38  
39 84 capital as a collective (and contextual) influence on health requires multilevel  
40  
41  
42 85 analysis.[13] Moreover, to establish a causal relationship between social capital and  
43  
44  
45 86 health, observational studies must include prospective longitudinal analyses.[7] Several  
46  
47  
48 87 multilevel prospective studies have suggested contextual effects of social capital on  
49  
50  
51 88 health outcomes, mortality,[14, 15] self-rated health,[16, 17] suicide,[18] depression,[19,  
52  
53  
54 89 20] and oral health.[21] Although two studies have reported an association between  
55  
56  
57 90 community social capital and the incidence of onset of functional disability among older  
58  
59  
60

1  
2  
3  
4  
5  
6  
7 91 people,[22, 23] evidence remains insufficient. The study areas in this previous work were  
8  
9 92 limited to certain parts of Japan, which limits the generalization of the results.  
10  
11  
12 93 Additionally, these studies' measures of community social capital might not provide a  
13  
14  
15 94 full picture of social capital because the scales used might fail to capture the multiple  
16  
17  
18 95 dimensions of social capital, such as its cognitive and structural aspects.[24, 25]  
19  
20

21 96 In the present study, we sought to examine the association between community  
22  
23  
24 97 social capital and the onset of functional disability among older people, using a  
25  
26  
27 98 prospective multilevel design and analyzing data from a nationwide survey in Japan. We  
28  
29  
30 99 measured community social capital using an indicator consisting of recently developed  
31  
32  
33 100 and validated multidimensional items.[26]  
34  
35

36 101

## 39 102 **METHODS**

### 42 103 **Study population**

44  
45 104 We utilized the Japan Gerontological Evaluation Study (JAGES) 2010–2013 cohort  
46  
47  
48 105 data.[27] Baseline data were collected using a self-administered questionnaire survey  
49  
50  
51 106 conducted from August 2010 to January 2012 among 85,161 people aged  $\geq 65$  years. The  
52  
53  
54 107 sample was restricted to people who did not already have functional disabilities, where  
55  
56  
57 108 functional disability was defined as being certified as eligible to receive long-term public  
58  
59  
60



1  
2  
3  
4  
5  
6 109 care insurance (LTCI) system services. A simple random sample was obtained from the  
7  
8  
9 110 official residence registers in 13 large municipalities, and a complete census was taken  
10  
11  
12 111 of older residents residing in the remaining 11 smaller municipalities (response rate =  
13  
14  
15 112 66.3%).

16  
17  
18 113 Survey data from 81,980 respondents who provided information for  
19  
20  
21 114 identification by the public LTCI system were linked to the public LTCI records dataset  
22  
23  
24 115 over a 3-year follow-up period beginning April 1, 2010. We excluded 4,549 respondents  
25  
26  
27 116 from 123 community areas with < 50 respondents to avoid non-precise values from small  
28  
29  
30 117 sample sizes,[26] 253 respondents with unknown areas of residence, 1,599 respondents  
31  
32  
33 118 who did not apply for public LTCI certification despite having basic activities of daily  
34  
35  
36 119 living (BADL) limitations, and, to avoid the problem of reverse causation, 2,558  
37  
38  
39 120 respondents who did not complete the BADL items. Finally, we used data from 73,021  
40  
41  
42 121 respondents in 323 community areas.

43  
44  
45 122

## 46 47 48 123 **Measurements**

### 49 50 51 124 Outcome

52  
53  
54 125 We collected information on the onset of functional disability from municipality-  
55  
56  
57 126 administered public LTCI records. The public LTCI system classifies frail older adults  
58  
59  
60

1  
2  
3  
4  
5  
6 127 into seven levels (“support need levels” 1 and 2 and “care need levels” 1–5; larger  
7  
8  
9 128 numbers indicate more severe need) using a nationally standardized and validated  
10  
11  
12 129 algorithm. This level is determined according to older adults’ physical and mental care  
13  
14  
15 130 needs, regardless of informal care received,[28] and it is assessed both through computer-  
16  
17  
18 131 based and home-visit interviews with a trained health care professional and through  
19  
20  
21 132 examinations conducted by a primary physician.[29] In the computer-based assessment,  
22  
23  
24 133 time needed for care is calculated according to nine categories of care needs, including  
25  
26  
27 134 five BADL domains (bathing, eating, toileting, dressing, and transferring), assistance  
28  
29  
30 135 with instrumental activities of daily living (IADL), behavioral problems, rehabilitation,  
31  
32  
33 136 and medical services.[28] In our study, the onset of functional disability was defined as  
34  
35  
36 137 a new registration in the public LTCI records with a care-needs level of two or above,  
37  
38  
39 138 which requires at least 50 minutes of care daily and generally corresponds to needing  
40  
41  
42 139 any type of BADL care.[29] We used this outcome measurement because it has been  
43  
44  
45 140 found to reflect healthy life expectancy.[30]

46  
47  
48 141

49  
50  
51 142 Community social capital

52  
53  
54 143 To measure community social capital, individual-level baseline data were aggregated for  
55  
56  
57 144 each of the 323 local districts. We assessed three components of community social capital  
58  
59  
60

1  
2  
3  
4  
5  
6 145 (community civic participation, social cohesion, and reciprocity), based on the instrument  
7  
8  
9 146 Saito et al. developed and validated for measuring health-related community social  
10  
11  
12 147 capital.[27] Briefly, the community level was defined as the school district, a measure of  
13  
14  
15 148 community social capital was generated using factor analysis, and the factor scores for  
16  
17  
18 149 each small district were used as community social capital variables.[22, 27] Level of  
19  
20  
21 150 community civic participation was assessed by summing the percentages of participation  
22  
23  
24 151 in volunteer, sports, and hobby groups in each community. Level of community social  
25  
26  
27 152 cohesion was measured by summing the percentages answering “very” or “moderately”  
28  
29  
30 153 (with possible response categories of “very,” “moderately,” “neutral” “disagree a little,”  
31  
32  
33 154 and “disagree”) to three items: trust (“Do you think people living in your area can be  
34  
35  
36 155 trusted, in general?”), perception of others’ intention to help (“Do you think people living  
37  
38  
39 156 in your area try to help others in most situations?”), and attachment to the residential  
40  
41  
42 157 area (“How attached are you to the area where you live?”). Level of community reciprocity  
43  
44  
45 158 was measured by summing the percentages answering “yes” to three items: receives  
46  
47  
48 159 emotional support (“Do you have someone who listens to your concerns and complaints?”),  
49  
50  
51 160 provides emotional support (“Do you listen to someone’s concerns and complaints?”), and  
52  
53  
54 161 receives instrumental support (“Do you have someone who looks after you when you are  
55  
56  
57 162 sick and confined to a bed for a few days?”). Community civic participation, social  
58  
59  
60

1  
2  
3  
4  
5  
6 163 cohesion, and reciprocity scores were standardized (subtracted from the mean and  
7  
8  
9 164 divided by the standard deviation). We applied school districts as the community unit  
10  
11  
12 165 because this was the smallest feasible area unit identifiable in the JAGES data; civic  
13  
14  
15 166 activities are often conducted within each school district, and older people can easily  
16  
17  
18 167 travel by foot or bicycle within the school district where they live.  
19

20  
21  
22 168

23  
24 169 Individual responses on community social capital indicators

25  
26  
27 170 The individual-level social components used, which are closely related to the components  
28  
29  
30 171 of community social capital, were group participation in the community, perception of  
31  
32  
33 172 community social capital, social support, and social isolation. Group participation in the  
34  
35  
36 173 community was measured as a count of participation in the following types of groups:  
37  
38  
39 174 volunteer, sports, or hobby groups. Perception of community social cohesion was  
40  
41  
42 175 measured as a count of a study participant's responses of "very" or "moderately" to the  
43  
44  
45 176 following items: trust, perception of others' intention to help, and attachment to the  
46  
47  
48 177 residential area. Social support was measured as a count of the number of the following  
49  
50  
51 178 types of social support each participant had: received emotional support, provided  
52  
53  
54 179 emotional support, and received instrumental support. Social isolation was measured  
55  
56  
57 180 using the frequency of meeting with friends: A few times per year or less was considered  
58  
59  
60

1  
2  
3  
4  
5  
6 181 moderate isolation, and more than once per month was considered non-isolation.  
7  
8  
9 182  
10  
11  
12 183 Covariates  
13  
14  
15 184 Sociodemographic characteristics and baseline health status were included in the  
16  
17  
18 185 analysis as covariates. These variables were age, equivalized income, educational  
19  
20  
21 186 attainment, marital status, self-rated health, self-reported body mass index (BMI), IADL,  
22  
23  
24 187 present illness, depression, lifestyle (smoking history, alcohol consumption, frequency of  
25  
26  
27 188 going outside), and individual social components. Age was categorized as 65–69, 70–74,  
28  
29  
30 189 75–79, 80–84, or 85 years or older. Educational attainment was categorized as < 6, 6–9,  
31  
32  
33 190 10–12, or  $\geq 13$  years. Equivalized income was categorized as low (< 1,990,000 JPY; 120  
34  
35  
36 191 JPY = 1 USD), middle (2,000,000–3,990,000 JPY), or high ( $\geq 4,000,000$  JPY). Marital  
37  
38  
39 192 status was categorized married, separated/divorced, or never married. Living  
40  
41  
42 193 arrangement was categorized as living with others or living alone. Self-rated health was  
43  
44  
45 194 measured using a single question: “What is your current health status?” with response  
46  
47  
48 195 options of “excellent,” “good,” “fair,” and “poor.” BMI was categorized as < 18.5, 18.5–  
49  
50  
51 196 24.9, or  $\geq 25$ . IADL was assessed using a five-item subscale of the Tokyo Metropolitan  
52  
53  
54 197 Institute of Gerontology Higher Competence Scale.[32] We categorized those who had  
55  
56  
57 198 difficulty with at least one item as “with difficulty”; others were categorized as “without  
58  
59  
60

1  
2  
3  
4  
5  
6 199 difficulty.” Present illness was measured using the following yes/no question: “Do you  
7  
8  
9 200 receive treatment now?” Depression was assessed using the 15-item Japanese version of  
10  
11  
12 201 the Geriatric Depression Scale (GDS),[32] with scores categorized as no depression (0–4  
13  
14  
15 202 points), depressive tendency (5–9 points), or depression ( $\geq 10$  points). Smoking history  
16  
17  
18 203 was categorized as non-smoking, quit before 5 years, quit within 4 years, or currently  
19  
20  
21 204 smoking. Alcohol consumption was categorized as never, past drinker, or current drinker.  
22  
23  
24 205 Frequency of going outside was categorized as almost every day, one to three times per  
25  
26  
27 206 week, or once or twice per month or less. Urbanization based on population density was  
28  
29  
30 207 categorized as urban ( $\geq 1500$  people/km<sup>2</sup>), suburban (1000–1500 people/ km<sup>2</sup>), or rural (<  
31  
32  
33 208 1000 people/ km<sup>2</sup>).

34  
35  
36 209

### 37 38 39 210 **Statistical analysis**

40  
41  
42 211 The data included 73,021 individuals (first level) nested in 323 local districts (second  
43  
44  
45 212 level). The median number of subjects in each local district was 90 (25th and 75th  
46  
47  
48 213 percentile: 63 and 317). The multilevel analysis framework assumes that individual  
49  
50  
51 214 health outcomes are partly dependent on the districts where individuals live. Multilevel  
52  
53  
54 215 models estimate the variation in outcomes across districts (random effects) and the  
55  
56  
57 216 effects of community-level variables on the outcome, adjusting for individual  
58  
59  
60

1  
2  
3  
4  
5  
6 217 compositional characteristics (fixed effects). Multilevel survival analysis using Cox  
7  
8  
9 218 proportional hazards regression models with stratification by sex was applied to  
10  
11  
12 219 calculate the hazard ratio (HR) and 95% confidence interval (95% CI) for functional  
13  
14  
15 220 disability during the follow-up period. HRs were estimated for a 1 SD change in the  
16  
17  
18 221 percentages of community social capital variables. We used the following analysis models.  
19  
20  
21 222 First, the null model was used to assess whether the onset of functional disability varied  
22  
23  
24 223 across districts. Then, the effect of community social capital on the onset of functional  
25  
26  
27 224 disability was investigated, adjusting for age, educational attainment, equivalized  
28  
29  
30 225 income, marital status, living arrangements, BMI, self-rated health, present illness,  
31  
32  
33 226 IADL, alcohol consumption, smoking history, and urbanization (Model 1). GDS score and  
34  
35  
36 227 frequency of going outside were then included (Model 2). The final model also included  
37  
38  
39 228 social isolation, group participation in the community, social perception of community  
40  
41  
42 229 social capital, and social support (Model 3). Because there was frequently missing data  
43  
44  
45 230 on the covariates, a “missing” category was created for the analyses. The significance  
46  
47  
48 231 level was set at  $p < 0.05$ . We used R (Version 3.4.3 for Windows) for all of the statistical  
49  
50  
51 232 analyses. Random effects models were estimated using the “coxme” function (coxme  
52  
53  
54 233 package).[33]  
55  
56  
57 234  
58  
59  
60

1  
2  
3  
4  
5  
6 235 **Ethical issues**  
7

8  
9 236 JAGES respondents were informed that participation in the study was voluntary and  
10  
11  
12 237 that completing and returning the self-administered questionnaire by mail indicated  
13  
14  
15 238 their consent to participate in the study. The ethics committee at Nihon Fukushi  
16  
17  
18 239 University approved the protocol and informed consent procedure for the present study  
19  
20  
21 240 (No. 10-05). This study conformed to the principles embodied in the Declaration of  
22  
23  
24 241 Helsinki.  
25

26  
27 242  
28  
29  
30 243 **Patient and public involvement**  
31

32  
33 244 No patients were involved in the development of the research question, study design or  
34  
35  
36 245 data interpretation in this study.  
37

38  
39 246  
40

41  
42 247 **RESULTS**  
43

44  
45 248 Of the 73,021 respondents over the follow-up period (average = 2.7 years), 34,051 were  
46  
47  
48 249 men and 38,970 were women. The average age was 73.3 years (SD = 6.0) for men and  
49  
50  
51 250 73.8 years (SD = 6.2) for women. During the follow-up period, 1465 (4.3%) new cases of  
52  
53  
54 251 functional disability occurred among men; among women, there were 1519 (3.9%) new  
55  
56  
57 252 cases of functional disability.  
58  
59  
60



1  
2  
3  
4  
5  
6  
7 253 Table 1 shows the descriptive characteristics of the respondents at baseline.  
8  
9  
10 254 Respondents with onset of functional disability were more likely to be older,  
11  
12 255 separated/divorced, presently ill, current or former drinkers, moderately socially isolated,  
13  
14  
15 256 and living in rural areas, and to have lower educational attainment, lower equivalized  
16  
17  
18 257 income, lower BMI, poor self-rated health, depression, IADL difficulties, lower frequency  
19  
20  
21 258 of going outside, no community group participation, and lower social support. These  
22  
23  
24 259 tendencies were almost identical for men and women.  
25  
26  
27  
28  
29  
30  
31  
32  
33  
34  
35  
36  
37  
38  
39  
40  
41  
42  
43  
44  
45  
46  
47  
48  
49  
50  
51  
52  
53  
54  
55  
56  
57  
58  
59  
60

260 **Table 1. Respondent characteristics**

|                                   | Men (n=34051) |      |                                      | Women (n=38970) |      |                                      |
|-----------------------------------|---------------|------|--------------------------------------|-----------------|------|--------------------------------------|
|                                   | n             | %    | Incidence rate per 1000 person-years | n               | %    | Incidence rate per 1000 person-years |
| <b>Age (years)</b>                |               |      |                                      |                 |      |                                      |
| 65-69                             | 11352         | 34.8 | 4.7                                  | 12018           | 32.1 | 2.7                                  |
| 70-74                             | 9751          | 29.9 | 9.9                                  | 10993           | 29.4 | 5.6                                  |
| 75-79                             | 7272          | 22.3 | 21.1                                 | 8570            | 22.9 | 14.7                                 |
| 80-84                             | 4045          | 12.4 | 33.8                                 | 5006            | 13.4 | 34.7                                 |
| 85 or older                       | 1631          | 5.0  | 79.4                                 | 2383            | 6.4  | 79.1                                 |
| <b>Educational attainment</b>     |               |      |                                      |                 |      |                                      |
| <6                                | 497           | 1.5  | 48.5                                 | 1211            | 3.1  | 59.4                                 |
| 6-9                               | 14523         | 42.7 | 18.3                                 | 18903           | 48.5 | 14.0                                 |
| 10-12                             | 10517         | 30.9 | 11.9                                 | 12272           | 31.5 | 10.4                                 |
| ≥13                               | 6844          | 20.1 | 12.6                                 | 4332            | 11.1 | 9.7                                  |
| Other or missing                  | 1670          | 4.9  | 28.7                                 | 2252            | 5.8  | 25.6                                 |
| <b>Equivalized income</b>         |               |      |                                      |                 |      |                                      |
| Low                               | 22521         | 69.1 | 14.7                                 | 22708           | 60.6 | 12.6                                 |
| Middle                            | 5653          | 17.3 | 13.0                                 | 5495            | 14.7 | 11.5                                 |
| High                              | 925           | 2.8  | 10.3                                 | 832             | 2.2  | 13.5                                 |
| Missing                           | 4952          | 15.2 | 27.1                                 | 9935            | 26.5 | 20.1                                 |
| <b>Marital status</b>             |               |      |                                      |                 |      |                                      |
| Married                           | 28361         | 87.0 | 14.4                                 | 21903           | 58.5 | 8.6                                  |
| Separated/divorced                | 3571          | 11.0 | 26.6                                 | 14132           | 37.7 | 22.0                                 |
| Never married                     | 444           | 1.4  | 9.8                                  | 815             | 2.2  | 20.9                                 |
| Other or missing                  | 1675          | 5.1  | 25.7                                 | 2120            | 5.7  | 21.8                                 |
| <b>Living arrangements</b>        |               |      |                                      |                 |      |                                      |
| Living with other                 | 30211         | 92.7 | 15.3                                 | 31306           | 83.6 | 13.6                                 |
| Living alone                      | 2287          | 7.0  | 19.1                                 | 6041            | 16.1 | 17.0                                 |
| Missing                           | 1553          | 4.8  | 27.5                                 | 1623            | 4.3  | 19.7                                 |
| <b>Body mass index</b>            |               |      |                                      |                 |      |                                      |
| <18.5                             | 1798          | 5.5  | 38.9                                 | 3098            | 8.3  | 26.0                                 |
| 18.5-24.9                         | 22990         | 70.6 | 14.1                                 | 24947           | 66.6 | 11.7                                 |
| ≥25.0                             | 7199          | 22.1 | 11.5                                 | 7896            | 21.1 | 11.7                                 |
| Missing                           | 2064          | 6.3  | 36.4                                 | 3029            | 8.1  | 32.6                                 |
| <b>Self-rated health</b>          |               |      |                                      |                 |      |                                      |
| Excellent                         | 4208          | 12.4 | 6.8                                  | 4173            | 10.7 | 6.3                                  |
| Good                              | 22743         | 66.8 | 11.8                                 | 27015           | 69.3 | 11.3                                 |
| Fair                              | 5778          | 17.0 | 33.3                                 | 6351            | 16.3 | 27.7                                 |
| Poor                              | 1021          | 3.0  | 57.9                                 | 878             | 2.3  | 49.9                                 |
| Missing                           | 301           | 0.9  | 26.7                                 | 553             | 1.4  | 22.3                                 |
| <b>Present illness</b>            |               |      |                                      |                 |      |                                      |
| No                                | 8391          | 25.8 | 9.7                                  | 8454            | 22.6 | 9.5                                  |
| Yes                               | 23171         | 71.1 | 17.8                                 | 26981           | 72.0 | 15.5                                 |
| Missing                           | 2489          | 7.6  | 22.4                                 | 3535            | 9.4  | 17.9                                 |
| <b>Geriatric Depression Scale</b> |               |      |                                      |                 |      |                                      |
| No depression                     | 21055         | 64.6 | 11.2                                 | 22164           | 59.2 | 10.1                                 |

|    |                                                |       |      |      |       |      |      |
|----|------------------------------------------------|-------|------|------|-------|------|------|
| 1  |                                                |       |      |      |       |      |      |
| 2  |                                                |       |      |      |       |      |      |
| 3  | Depressive tendency                            | 6063  | 18.6 | 22.3 | 6491  | 17.3 | 19.9 |
| 4  | Depression                                     | 2013  | 6.2  | 29.3 | 2083  | 5.6  | 29.2 |
| 5  | Missing                                        | 4920  | 15.1 | 24.7 | 8232  | 22.0 | 18.1 |
| 6  |                                                |       |      |      |       |      |      |
| 7  | <b>Instrumental activities of daily living</b> |       |      |      |       |      |      |
| 8  | Without difficulty                             | 22452 | 68.9 | 10.8 | 31079 | 83.0 | 7.8  |
| 9  | With difficulty                                | 8996  | 27.6 | 27.4 | 5188  | 13.9 | 49.5 |
| 10 | Missing                                        | 2603  | 8.0  | 23.8 | 2703  | 7.2  | 25.2 |
| 11 |                                                |       |      |      |       |      |      |
| 12 | <b>Alcohol consumption</b>                     |       |      |      |       |      |      |
| 13 | Never                                          | 18187 | 53.4 | 11.6 | 5405  | 13.9 | 7.8  |
| 14 | Past                                           | 2022  | 5.9  | 27.2 | 366   | 0.9  | 21.5 |
| 15 | Current                                        | 11710 | 34.4 | 20.5 | 30709 | 78.8 | 15.1 |
| 16 | Missing                                        | 2132  | 6.3  | 20.6 | 2490  | 6.4  | 18.4 |
| 17 |                                                |       |      |      |       |      |      |
| 18 | <b>Smoking history</b>                         |       |      |      |       |      |      |
| 19 | Non-smoking                                    | 8191  | 25.1 | 14.4 | 31089 | 83.0 | 13.6 |
| 20 | Non-smoking now, quit before 5                 |       |      |      |       |      |      |
| 21 | years                                          | 13967 | 42.9 | 16.0 | 1232  | 3.3  | 16.4 |
| 22 |                                                |       |      |      |       |      |      |
| 23 | Non-smoking now, quit within 4                 |       |      |      |       |      |      |
| 24 | years                                          | 2934  | 9.0  | 16.6 | 446   | 1.2  | 12.8 |
| 25 | Smoking                                        | 6305  | 19.3 | 16.5 | 1130  | 3.0  | 14.9 |
| 26 | Missing                                        | 2654  | 8.1  | 20.8 | 5073  | 13.5 | 18.7 |
| 27 |                                                |       |      |      |       |      |      |
| 28 | <b>Frequency of going outside</b>              |       |      |      |       |      |      |
| 29 | Once to twice a month or less                  | 1905  | 5.6  | 48.5 | 2758  | 7.1  | 40.8 |
| 30 | One to three times a week                      | 10397 | 30.5 | 19.7 | 16099 | 41.3 | 16.2 |
| 31 | Almost everyday                                | 19632 | 57.7 | 10.6 | 17799 | 45.7 | 8.1  |
| 32 | Missing                                        | 2117  | 6.2  | 22.8 | 2314  | 5.9  | 20.1 |
| 33 |                                                |       |      |      |       |      |      |
| 34 | <b>Social isolation</b>                        |       |      |      |       |      |      |
| 35 | Non-isolation                                  | 21650 | 66.4 | 12.7 | 29475 | 78.7 | 11.8 |
| 36 | Moderately isolation                           | 10038 | 30.8 | 20.7 | 6261  | 16.7 | 21.4 |
| 37 | Missing                                        | 2363  | 7.3  | 28.6 | 3234  | 8.6  | 25.1 |
| 38 |                                                |       |      |      |       |      |      |
| 39 | <b>Group participation in the</b>              |       |      |      |       |      |      |
| 40 | <b>community</b>                               |       |      |      |       |      |      |
| 41 | Non                                            | 16011 | 47.0 | 18.3 | 14364 | 36.9 | 19.7 |
| 42 | One                                            | 5562  | 16.3 | 9.3  | 6376  | 16.4 | 6.8  |
| 43 | Over two                                       | 5180  | 15.2 | 7.9  | 6412  | 16.5 | 5.4  |
| 44 | Missing                                        | 7298  | 21.4 | 22.8 | 11818 | 30.3 | 17.1 |
| 45 |                                                |       |      |      |       |      |      |
| 46 | <b>Social support</b>                          |       |      |      |       |      |      |
| 47 | Non                                            | 617   | 1.8  | 17.0 | 305   | 0.8  | 21.3 |
| 48 | One                                            | 1260  | 3.7  | 17.8 | 690   | 1.8  | 21.3 |
| 49 | Over two                                       | 30004 | 88.1 | 15.3 | 35523 | 91.2 | 13.4 |
| 50 | Missing                                        | 2170  | 6.4  | 26.7 | 2452  | 6.3  | 25.5 |
| 51 |                                                |       |      |      |       |      |      |
| 52 | <b>Perception of community social</b>          |       |      |      |       |      |      |
| 53 | <b>cohesion</b>                                |       |      |      |       |      |      |
| 54 | Non                                            | 3312  | 9.7  | 18.4 | 4345  | 11.1 | 14.3 |
| 55 | One                                            | 5001  | 14.7 | 13.7 | 6205  | 15.9 | 12.1 |
| 56 | Over two                                       | 23560 | 69.2 | 15.1 | 25592 | 65.7 | 14.1 |
| 57 | Missing                                        | 2178  | 6.4  | 29.5 | 2828  | 7.3  | 22.1 |
| 58 |                                                |       |      |      |       |      |      |
| 59 | <b>Urbanization</b>                            |       |      |      |       |      |      |
| 60 |                                                |       |      |      |       |      |      |

|    |          |       |      |      |       |      |      |
|----|----------|-------|------|------|-------|------|------|
| 1  |          |       |      |      |       |      |      |
| 2  |          |       |      |      |       |      |      |
| 3  | Rural    | 10594 | 32.5 | 18.0 | 13169 | 35.2 | 16.2 |
| 4  | Suburban | 18560 | 57.0 | 15.8 | 20278 | 54.1 | 14.0 |
| 5  | Urban    | 4897  | 15.0 | 11.9 | 5523  | 14.7 | 10.3 |
| 6  |          |       |      |      |       |      |      |
| 7  |          |       |      |      |       |      |      |
| 8  | 261      |       |      |      |       |      |      |
| 9  |          |       |      |      |       |      |      |
| 10 |          |       |      |      |       |      |      |
| 11 |          |       |      |      |       |      |      |
| 12 |          |       |      |      |       |      |      |
| 13 |          |       |      |      |       |      |      |
| 14 |          |       |      |      |       |      |      |
| 15 |          |       |      |      |       |      |      |
| 16 |          |       |      |      |       |      |      |
| 17 |          |       |      |      |       |      |      |
| 18 |          |       |      |      |       |      |      |
| 19 |          |       |      |      |       |      |      |
| 20 |          |       |      |      |       |      |      |
| 21 |          |       |      |      |       |      |      |
| 22 |          |       |      |      |       |      |      |
| 23 |          |       |      |      |       |      |      |
| 24 |          |       |      |      |       |      |      |
| 25 |          |       |      |      |       |      |      |
| 26 |          |       |      |      |       |      |      |
| 27 |          |       |      |      |       |      |      |
| 28 |          |       |      |      |       |      |      |
| 29 |          |       |      |      |       |      |      |
| 30 |          |       |      |      |       |      |      |
| 31 |          |       |      |      |       |      |      |
| 32 |          |       |      |      |       |      |      |
| 33 |          |       |      |      |       |      |      |
| 34 |          |       |      |      |       |      |      |
| 35 |          |       |      |      |       |      |      |
| 36 |          |       |      |      |       |      |      |
| 37 |          |       |      |      |       |      |      |
| 38 |          |       |      |      |       |      |      |
| 39 |          |       |      |      |       |      |      |
| 40 |          |       |      |      |       |      |      |
| 41 |          |       |      |      |       |      |      |
| 42 |          |       |      |      |       |      |      |
| 43 |          |       |      |      |       |      |      |
| 44 |          |       |      |      |       |      |      |
| 45 |          |       |      |      |       |      |      |
| 46 |          |       |      |      |       |      |      |
| 47 |          |       |      |      |       |      |      |
| 48 |          |       |      |      |       |      |      |
| 49 |          |       |      |      |       |      |      |
| 50 |          |       |      |      |       |      |      |
| 51 |          |       |      |      |       |      |      |
| 52 |          |       |      |      |       |      |      |
| 53 |          |       |      |      |       |      |      |
| 54 |          |       |      |      |       |      |      |
| 55 |          |       |      |      |       |      |      |
| 56 |          |       |      |      |       |      |      |
| 57 |          |       |      |      |       |      |      |
| 58 |          |       |      |      |       |      |      |
| 59 |          |       |      |      |       |      |      |
| 60 |          |       |      |      |       |      |      |

For peer review only

1  
2  
3  
4  
5  
6 262 Tables 2 and 3 show the results of multilevel the survival analyses for men and  
7  
8  
9 263 women, respectively. In the multivariable-adjusted model (Model 1), among men, a  
10  
11  
12 264 significant association was observed between community-level social capital and  
13  
14  
15 265 incidence of functional disability for “social cohesion” (HR = 0.904, 95% CI: 0.824–0.992,  
16  
17  
18 266  $p$ -value < 0.05). This association was maintained after adding individual GDS score and  
19  
20  
21 267 frequency of going outside (HR = 0.909, 95% CI: 0.829–0.996,  $p$ -value < 0.05; Model 2)  
22  
23  
24 268 and individual responses on community social capital indicators (HR = 0.910, 95% CI:  
25  
26  
27 269 0.830–0.998; Model 3). Although the associations of incidence of functional disability  
28  
29  
30 270 with community-level civic participation and with reciprocity were not statistically  
31  
32  
33 271 significant, the point estimates for these effects were in the same direction, with HRs <  
34  
35  
36 272 1.0 (civic participation: HR = 0.972, 95% CI: 0.893–1.058; reciprocity: HR = 0.920, 95%  
37  
38  
39 273 CI: 0.829–1.021; Model 3). Among women, no significant association was observed (civic  
40  
41  
42 274 participation: HR = 0.999, 95% CI: 0.918–1.087; social cohesion: HR = 0.930, 95% CI:  
43  
44  
45 275 0.847–1.020; reciprocity: HR = 1.002, 95% CI: 0.901–1.114; Model 3).  
46  
47  
48  
49  
50  
51  
52  
53  
54  
55  
56  
57  
58  
59  
60

276 **Table 2. Multilevel survival analysis of functional disability among male respondents (n = 34,051)**

|                                                                          | Model 1                  | Model 2                  | Model 3                  |
|--------------------------------------------------------------------------|--------------------------|--------------------------|--------------------------|
|                                                                          | HR (95 % CI)             | HR (95 % CI)             | HR (95 % CI)             |
| <i>Fixed effects</i>                                                     |                          |                          |                          |
| <i>Community-level variables</i>                                         |                          |                          |                          |
| <b>Community-level social capital</b>                                    |                          |                          |                          |
| Civic participation                                                      | 0.956 (0.878-1.041)      | 0.959 (0.882-1.044)      | 0.972 (0.893-1.058)      |
| Social cohesion                                                          | 0.904 (0.824-0.992) *    | 0.909 (0.829-0.996) *    | 0.910 (0.830-0.998) *    |
| Reciprocity                                                              | 0.930 (0.837-1.032)      | 0.933 (0.841-1.035)      | 0.920 (0.829-1.021)      |
| <b>Urbanization (ref: Urban)</b>                                         |                          |                          |                          |
| Suburban                                                                 | 1.238 (0.977-1.568)      | 1.230 (0.972-1.557)      | 1.241 (0.981-1.571)      |
| Rural                                                                    | 1.278 (0.986-1.655)      | 1.232 (0.951-1.596)      | 1.251 (0.967-1.620)      |
| <i>Individual-level variables</i>                                        |                          |                          |                          |
| <b>Age (ref: 65-69 years)</b>                                            |                          |                          |                          |
| 70-74                                                                    | 1.963 (1.603-2.403) **   | 1.940 (1.584-2.376) **   | 1.948 (1.591-2.387) **   |
| 75-79                                                                    | 3.624 (2.989-4.394) **   | 3.550 (2.928-4.305) **   | 3.549 (2.924-4.307) **   |
| 80-84                                                                    | 5.115 (4.189-6.246) **   | 4.876 (3.990-5.958) **   | 4.800 (3.923-5.873) **   |
| 85 or older                                                              | 11.241 (9.126-13.846) ** | 10.371 (8.407-12.795) ** | 10.011 (8.099-12.375) ** |
| <b>Educational attainment (ref: &lt;6)</b>                               |                          |                          |                          |
| 6-9                                                                      | 0.717 (0.549-0.938) *    | 0.738 (0.564-0.965) *    | 0.738 (0.564-0.966) *    |
| 10-12                                                                    | 0.682 (0.513-0.906) **   | 0.720 (0.542-0.957) *    | 0.727 (0.547-0.967) *    |
| ≥13                                                                      | 0.745 (0.554-1.000)      | 0.781 (0.581-1.050)      | 0.793 (0.590-1.067)      |
| <b>Equivalized income (ref: Low)</b>                                     |                          |                          |                          |
| Middle                                                                   | 1.234 (1.043-1.459) *    | 1.061 (0.903-1.247)      | 1.067 (0.908-1.254)      |
| High                                                                     | 0.961 (0.523-1.769)      | 1.015 (0.673-1.530)      | 1.007 (0.668-1.519)      |
| <b>Marital status (ref: Married)</b>                                     |                          |                          |                          |
| Separated/divorced                                                       | 1.028 (0.875-1.208)      | 1.218 (1.029-1.441) *    | 1.241 (1.048-1.470) *    |
| Never married                                                            | 0.962 (0.638-1.449)      | 0.907 (0.493-1.667)      | 0.929 (0.504-1.713)      |
| <b>Living arrangements (ref: Living with other)</b>                      |                          |                          |                          |
| Living alone                                                             | 1.012 (0.799-1.282)      | 1.013 (0.798-1.284)      | 1.036 (0.815-1.317)      |
| <b>Body mass index (ref: 18.5-24.9)</b>                                  |                          |                          |                          |
| <18.5                                                                    | 1.688 (1.431-1.993) **   | 1.651 (1.399-1.949) **   | 1.633 (1.383-1.927) **   |
| ≥25.0                                                                    | 0.919 (0.792-1.065)      | 0.926 (0.798-1.074)      | 0.932 (0.804-1.081)      |
| <b>Self-rated health (ref: Excellent)</b>                                |                          |                          |                          |
| Good                                                                     | 1.356 (1.068-1.722) *    | 1.289 (1.014-1.637) *    | 1.265 (0.996-1.608)      |
| Fair                                                                     | 2.831 (2.205-3.636) **   | 2.464 (1.910-3.178) **   | 2.387 (1.850-3.079) **   |
| Poor                                                                     | 4.396 (3.287-5.881) **   | 3.638 (2.699-4.903) **   | 3.515 (2.606-4.740) **   |
| <b>Present illness (ref: No)</b>                                         |                          |                          |                          |
| Yes                                                                      | 1.140 (0.978-1.327)      | 1.143 (0.981-1.331)      | 1.146 (0.983-1.334)      |
| <b>Instrumental activities of daily living (ref: Without difficulty)</b> |                          |                          |                          |
| With difficulty                                                          | 1.798 (1.606-2.013) **   | 1.654 (1.475-1.856) **   | 1.635 (1.457-1.835) **   |
| <b>Alcohol consumption (ref: Non)</b>                                    |                          |                          |                          |
| Past                                                                     | 1.089 (0.905-1.310)      | 1.074 (0.893-1.292)      | 1.055 (0.877-1.270)      |

|    |                                              |                        |                        |                        |
|----|----------------------------------------------|------------------------|------------------------|------------------------|
| 1  |                                              |                        |                        |                        |
| 2  |                                              |                        |                        |                        |
| 3  | Current                                      | 0.850 (0.757-0.954) ** | 0.866 (0.771-0.973) *  | 0.873 (0.777-0.981) *  |
| 4  | <b>Smoking history (ref: Non-</b>            |                        |                        |                        |
| 5  | <b>smoking)</b>                              |                        |                        |                        |
| 6  | Non-smoking now, quit before 5               | 1.089 (0.948-1.250)    | 1.075 (0.936-1.234)    | 1.071 (0.932-1.230)    |
| 7  | years                                        |                        |                        |                        |
| 8  | Non-smoking now, quit within 4               | 1.256 (1.021-1.545) *  | 1.237 (1.006-1.522) *  | 1.221 (0.993-1.502)    |
| 9  | years                                        |                        |                        |                        |
| 10 | Smoking                                      | 1.357 (1.153-1.598) ** | 1.320 (1.120-1.554) ** | 1.304 (1.107-1.536) ** |
| 11 |                                              |                        |                        |                        |
| 12 | <b>Geriatric Depression Scale (ref: No</b>   |                        |                        |                        |
| 13 | <b>depression)</b>                           |                        |                        |                        |
| 14 | Depression tendency                          |                        | 1.224 (1.069-1.402) ** | 1.214 (1.059-1.392) ** |
| 15 | Depression                                   |                        | 1.222 (1.011-1.477) *  | 1.236 (1.017-1.501) *  |
| 16 |                                              |                        |                        |                        |
| 17 | <b>Frequency of going outside (ref:</b>      |                        |                        |                        |
| 18 | <b>Almost everyday)</b>                      |                        |                        |                        |
| 19 | One to three times a week                    |                        | 1.237 (1.096-1.397) ** | 1.225 (1.084-1.383) ** |
| 20 | Once to twice a month or less                |                        | 1.899 (1.611-2.238) ** | 1.801 (1.524-2.128) ** |
| 21 |                                              |                        |                        |                        |
| 22 | <b>Social isolation (ref: Non-isolation)</b> |                        |                        |                        |
| 23 | Moderately isolation                         |                        |                        | 1.060 (0.939-1.196)    |
| 24 |                                              |                        |                        |                        |
| 25 | <b>Group participation in the</b>            |                        |                        |                        |
| 26 | <b>community (ref: Non)</b>                  |                        |                        |                        |
| 27 | One                                          |                        |                        | 0.778 (0.645-0.937) ** |
| 28 | Over two                                     |                        |                        | 0.725 (0.588-0.894) ** |
| 29 |                                              |                        |                        |                        |
| 30 | <b>Social support (ref: Non)</b>             |                        |                        |                        |
| 31 | One                                          |                        |                        | 0.993 (0.625-1.578)    |
| 32 | Over two                                     |                        |                        | 1.287 (0.864-1.917)    |
| 33 |                                              |                        |                        |                        |
| 34 | <b>Perception of community social</b>        |                        |                        |                        |
| 35 | <b>cohesion (ref: Non)</b>                   |                        |                        |                        |
| 36 | One                                          |                        |                        | 0.852 (0.686-1.057)    |
| 37 | Over two                                     |                        |                        | 1.020 (0.853-1.220)    |
| 38 |                                              |                        |                        |                        |
| 39 |                                              |                        |                        |                        |
| 40 |                                              |                        |                        |                        |
| 41 | <b>Random effects</b>                        |                        |                        |                        |
| 42 | <b>Community-level variance</b>              | 0.0223                 | 0.0210                 | 0.0199                 |

43 277 \* $p < 0.05$ , \*\* $p < 0.01$

44  
45 278 Values presented are HRs (hazard ratios) and 95% CIs (confidence intervals). Community-level social capital variables (civic  
46 279 participation, social cohesion, and reciprocity) are 1 SD increase estimates. Variance of the intercept in the null model = 0.0336

47  
48  
49  
50  
51  
52  
53  
54  
55  
56  
57  
58  
59  
60

280 **Table 3. Multilevel survival analysis of functional disability among female respondents (n = 38,970)**

|                                                                          | Model 1                   | Model 2                   | Model 3                   |
|--------------------------------------------------------------------------|---------------------------|---------------------------|---------------------------|
|                                                                          | HR (95% CI)               | HR (95% CI)               | HR (95% CI)               |
| <i>Fixed effects</i>                                                     |                           |                           |                           |
| <i>Community-level variables</i>                                         |                           |                           |                           |
| <b>Community-level social capital</b>                                    |                           |                           |                           |
| Civic participation                                                      | 0.986 (0.907-1.072)       | 0.987 (0.908-1.072)       | 0.999 (0.918-1.087)       |
| Social cohesion                                                          | 0.936 (0.854-1.027)       | 0.935 (0.853-1.025)       | 0.930 (0.847-1.020)       |
| Reciprocity                                                              | 1.003 (0.903-1.115)       | 1.007 (0.906-1.119)       | 1.002 (0.901-1.114)       |
| <b>Urbanization (ref: Urban)</b>                                         |                           |                           |                           |
| Suburban                                                                 | 0.977 (0.772-1.236)       | 0.968 (0.765-1.225)       | 0.978 (0.772-1.238)       |
| Rural                                                                    | 1.045 (0.809-1.351)       | 1.013 (0.784-1.309)       | 1.024 (0.792-1.324)       |
| <i>Individual-level variables</i>                                        |                           |                           |                           |
| <b>Age (ref: 65-69 years)</b>                                            |                           |                           |                           |
| 70-74                                                                    | 1.911 (1.478-2.469) **    | 1.899 (1.469-2.455) **    | 1.896 (1.466-2.451) **    |
| 75-79                                                                    | 4.174 (3.293-5.290) **    | 4.111 (3.242-5.213) **    | 4.066 (3.203-5.161) **    |
| 80-84                                                                    | 8.084 (6.371-10.257) **   | 7.915 (6.232-10.052) **   | 7.733 (6.079-9.838) **    |
| 85 or older                                                              | 14.654 (11.434-18.780) ** | 14.137 (11.016-18.143) ** | 13.749 (10.694-17.677) ** |
| <b>Educational attainment (ref: &lt;6)</b>                               |                           |                           |                           |
| 6-9                                                                      | 0.723 (0.611-0.857) **    | 0.729 (0.615-0.863) **    | 0.734 (0.620-0.870) **    |
| 10-12                                                                    | 0.679 (0.561-0.822) **    | 0.687 (0.568-0.832) **    | 0.701 (0.578-0.849) **    |
| ≥13                                                                      | 0.792 (0.617-1.015)       | 0.806 (0.629-1.034)       | 0.826 (0.643-1.059)       |
| <b>Equivalent income (ref: Low)</b>                                      |                           |                           |                           |
| Middle                                                                   | 1.037 (0.876-1.229)       | 1.062 (0.896-1.259)       | 1.063 (0.897-1.261)       |
| High                                                                     | 1.440 (0.989-2.097)       | 1.505 (1.033-2.193) *     | 1.500 (1.029-2.186) *     |
| <b>Marital status (ref: Married)</b>                                     |                           |                           |                           |
| Separated/divorced                                                       | 1.078 (0.949-1.224)       | 1.068 (0.940-1.213)       | 1.064 (0.936-1.209)       |
| Never married                                                            | 1.356 (0.983-1.870)       | 1.330 (0.964-1.834)       | 1.338 (0.969-1.848)       |
| <b>Living arrangements (ref: Living with other)</b>                      |                           |                           |                           |
| Living alone                                                             | 1.055 (0.912-1.221)       | 1.044 (0.902-1.209)       | 1.071 (0.924-1.241)       |
| <b>Body mass index (ref: 18.5-24.9)</b>                                  |                           |                           |                           |
| <18.5                                                                    | 1.423 (1.220-1.661) **    | 1.395 (1.195-1.628) **    | 1.363 (1.168-1.592) **    |
| ≥25.0                                                                    | 0.997 (0.865-1.149)       | 0.994 (0.862-1.146)       | 1.003 (0.870-1.157)       |
| <b>Self-rated health (ref: Excellent)</b>                                |                           |                           |                           |
| Good                                                                     | 1.404 (1.098-1.795) **    | 1.350 (1.054-1.727) *     | 1.333 (1.041-1.707) *     |
| Fair                                                                     | 2.354 (1.818-3.049) **    | 2.111 (1.622-2.746) **    | 2.078 (1.596-2.706) **    |
| Poor                                                                     | 3.439 (2.524-4.685) **    | 2.934 (2.138-4.027) **    | 2.856 (2.077-3.926) **    |
| <b>Present illness (ref: No)</b>                                         |                           |                           |                           |
| Yes                                                                      | 0.943 (0.811-1.097)       | 0.946 (0.813-1.101)       | 0.954 (0.820-1.111)       |
| <b>Instrumental activities of daily living (ref: Without difficulty)</b> |                           |                           |                           |
| With difficulty                                                          | 2.449 (2.167-2.767) **    | 2.287 (2.016-2.595) **    | 2.171 (1.911-2.467)       |
| <b>Alcohol consumption (ref: Non)</b>                                    |                           |                           |                           |
| Past                                                                     | 1.574 (1.005-2.467) *     | 1.550 (0.988-2.430)       | 1.624 (1.035-2.548) *     |



|    |                                              |                        |                        |                        |
|----|----------------------------------------------|------------------------|------------------------|------------------------|
| 1  |                                              |                        |                        |                        |
| 2  |                                              |                        |                        |                        |
| 3  | Current                                      | 0.915 (0.751-1.116)    | 0.936 (0.767-1.141)    | 0.949 (0.778-1.157)    |
| 4  | <b>Smoking history (ref: Non-</b>            |                        |                        |                        |
| 5  | <b>smoking)</b>                              |                        |                        |                        |
| 6  | Non-smoking now, quit before 5               | 1.490 (1.121-1.981) ** | 1.454 (1.093-1.934) *  | 1.455 (1.094-1.936) *  |
| 7  | years                                        |                        |                        |                        |
| 8  | Non-smoking now, quit within 4               | 1.289 (0.758-2.193)    | 1.291 (0.759-2.197)    | 1.250 (0.735-2.129)    |
| 9  | years                                        |                        |                        |                        |
| 10 | Smoking                                      | 1.468 (1.077-2.000) *  | 1.430 (1.048-1.949) *  | 1.400 (1.026-1.911) *  |
| 11 |                                              |                        |                        |                        |
| 12 | <b>Geriatric Depression Scale (ref: No</b>   |                        |                        |                        |
| 13 | <b>depression)</b>                           |                        |                        |                        |
| 14 | Depression tendency                          |                        | 1.232 (1.074-1.414) ** | 1.240 (1.080-1.423) ** |
| 15 | Depression                                   |                        | 1.346 (1.116-1.624) ** | 1.364 (1.127-1.651) ** |
| 16 |                                              |                        |                        |                        |
| 17 | <b>Frequency of going outside (ref:</b>      |                        |                        |                        |
| 18 | <b>Almost everyday)</b>                      |                        |                        |                        |
| 19 | One to three times a week                    |                        | 1.119 (0.985-1.272)    | 1.098 (0.965-1.249)    |
| 20 | Once to twice a month or less                |                        | 1.323 (1.120-1.563) ** | 1.257 (1.060-1.491) ** |
| 21 |                                              |                        |                        |                        |
| 22 | <b>Social isolation (ref: Non-isolation)</b> |                        |                        |                        |
| 23 | Moderately isolation                         |                        |                        | 1.116 (0.977-1.275)    |
| 24 |                                              |                        |                        |                        |
| 25 | <b>Group participation in the</b>            |                        |                        |                        |
| 26 | <b>community (ref: Non)</b>                  |                        |                        |                        |
| 27 | One                                          |                        |                        | 0.678 (0.555-0.829) ** |
| 28 | Over two                                     |                        |                        | 0.736 (0.587-0.923) ** |
| 29 |                                              |                        |                        |                        |
| 30 | <b>Social support (ref: Non)</b>             |                        |                        |                        |
| 31 | One                                          |                        |                        | 0.727 (0.408-1.295)    |
| 32 | Over two                                     |                        |                        | 1.010 (0.619-1.647)    |
| 33 |                                              |                        |                        |                        |
| 34 | <b>Perception of community social</b>        |                        |                        |                        |
| 35 | <b>cohesion (ref: Non)</b>                   |                        |                        |                        |
| 36 | One                                          |                        |                        | 0.912 (0.740-1.123)    |
| 37 | Over two                                     |                        |                        | 1.145 (0.961-1.364)    |
| 38 |                                              |                        |                        |                        |
| 39 |                                              |                        |                        |                        |
| 40 |                                              |                        |                        |                        |
| 41 | <b>Random effects</b>                        |                        |                        |                        |
| 42 | <b>Community-level variance</b>              | 0.0202                 | 0.0194                 | 0.0209                 |

43 281 \* $p < 0.05$ , \*\* $p < 0.01$

44 282 Values presented are HRs (hazard ratios) and 95% CIs (confidence intervals). Community-level social capital variables (civic  
45 283 participation, social cohesion, and reciprocity) are 1 SD increase estimates. Variance of the intercept in the null model = 0.0351

46  
47  
48  
49  
50  
51  
52  
53  
54  
55  
56  
57  
58  
59  
60

1  
2  
3  
4  
5  
6 284 **DISCUSSION**  
7  
8

9 285 To the best of our knowledge, this was the first study with a multilevel longitudinal  
10  
11  
12 286 design to examine the association between community social capital and the onset of  
13  
14  
15 287 functional disability using social capital indicators with verified validity in a large  
16  
17  
18 288 sample of older community-dwelling adults. The results suggested that living in a  
19  
20  
21 289 community with higher community social cohesion at baseline was associated with a  
22  
23  
24 290 lower future risk of functional disability, even after adjusting for individual responses  
25  
26  
27 291 on community social capital indicators. The present study indicated the importance of  
28  
29  
30 292 strategies to protect the health of older people through fostering cohesive communities  
31  
32  
33 293 with efforts such as promoting social connections and trust.  
34  
35

36 294 There are several possible pathways between community social cohesion and  
37  
38  
39 295 health. Social cohesion is determined by the resources available to members of tight-knit  
40  
41  
42 296 communities.[34] Cohesive communities might help residents to express trust toward  
43  
44  
45 297 their neighbors and to be psychologically healthier. Previous studies have revealed that  
46  
47  
48 298 neighborhood social cohesion positively affected older people's subjective well-being,[35,  
49  
50  
51 299 36] and that cohesive communities prevented the occurrence of depressive symptoms in  
52  
53  
54 300 older people who lived alone and were at high risk of functional disability.[37] Thus, we  
55  
56  
57 301 considered high levels of community social cohesion to be potentially protective against  
58  
59  
60

1  
2  
3  
4  
5  
6 302 the onset of functional disability via the positive effects on psychological health, such as  
7  
8  
9 303 enhancing subjective well-being and inhibiting depressive symptoms.

10  
11  
12 304 Two previous studies examined the association between community social  
13  
14  
15 305 capital and the onset of functional disability in older people using multilevel longitudinal  
16  
17  
18 306 designs.[23, 24] Our results suggesting that higher community social cohesion was  
19  
20  
21 307 associated with lower risk of functional disability among men but not women were  
22  
23  
24 308 inconsistent with these previous studies. There are several possible reasons for this  
25  
26  
27 309 difference. First, both previous studies were surveys in a smaller area, compared with  
28  
29  
30 310 that in our research. Because our work used survey data from municipalities nationwide,  
31  
32  
33 311 the possibility for generalizing our findings might be higher. Second, the measurement  
34  
35  
36 312 index of community social capital in the previous studies differed from ours. Both  
37  
38  
39 313 previous studies used only one item (“general trust”) to measure community social  
40  
41  
42 314 cohesion. In contrast, we used multidimensional indicators consisting of three  
43  
44  
45 315 measurement items with verified validity, which might be more accurate for examining  
46  
47  
48 316 community contextual effects. Therefore, our results might reflect more accurate  
49  
50  
51 317 estimates of the effects of community social cohesion on individual health.

52  
53  
54 318 In the present study, community social cohesion affected the onset of functional  
55  
56  
57 319 disability only among men. It is likely that, among people who are currently in the older  
58  
59  
60

1  
2  
3  
4  
5  
6 320 age groups, men sought and had stronger relationships with their colleagues before  
7  
8  
9 321 retirement than did women, given the nature of companies, particularly in Japan.[38]  
10  
11  
12 322 When this strong commitment is lost after retirement, these men may also experience a  
13  
14  
15 323 variety of changes in their living arrangements, leading to changes in their physical and  
16  
17  
18 324 mental health.[39] A cohesive community might be helpful in building new connections  
19  
20  
21 325 and encouraging social participation, which may keep men healthier and improve their  
22  
23  
24 326 psychological well-being. Honjo, et al. reported that rich social cohesion in a community  
25  
26  
27 327 buffered the risk of depression among older men living alone in Japan.[37] Thus,  
28  
29  
30 328 community cohesiveness may protect men's psychological health by helping them to  
31  
32  
33 329 build new connections in the community after retirement. However, further studies are  
34  
35  
36 330 needed to validate this hypothesis.

37  
38  
39 331 The present study had several strengths. First, using a large, nationwide  
40  
41  
42 332 population-based sample enabled us to conduct a community-level multilevel analysis to  
43  
44  
45 333 clarify the contextual relationship between community-level social capital and the onset  
46  
47  
48 334 of functional disability. Second, we used validated indicators consisting of  
49  
50  
51 335 multidimensional items to measure community social capital. Therefore, we may have  
52  
53  
54 336 appropriately captured the whole of community social capital. However, the study also  
55  
56  
57 337 had several limitations. First, because the measurement was based on a self-

1  
2  
3  
4  
5  
6 338 administered questionnaire, the results are subject to response bias such as social  
7  
8  
9 339 desirability.[40] Social desirability bias may artificially inflate social capital as  
10  
11  
12 340 calculated from the responses to the questionnaire. Second, our study included no  
13  
14  
15 341 information about changes in social capital. Therefore, it is possible that unmeasured  
16  
17  
18 342 time-varying covariates such as economic changes or natural disasters may have biased  
19  
20  
21 343 our results. Third, although our study was a prospective cohort study, the follow-up  
22  
23  
24 344 period was moderately short. Considering the possibility of reverse causation, analyses  
25  
26  
27 345 with a longer follow-up period are necessary in the future.  
28  
29

30  
31 346

## 32 33 347 **CONCLUSION**

34  
35  
36 348 In conclusion, this multilevel prospective cohort study found that higher levels of  
37  
38  
39 349 community social cohesion were associated with a lower incidence of onset of functional  
40  
41  
42 350 disability among older men, but not among older women, even after adjusting for  
43  
44  
45 351 individual social and behavioral variables. The findings suggest the importance of  
46  
47  
48 352 fostering cohesive communities to reduce the onset functional disability among older  
49  
50  
51 353 people.  
52

53  
54 354

## 55 56 57 355 **ACKNOWLEDGMENTS**

1  
2  
3  
4  
5  
6 356 This study used data from the Japan Gerontological Evaluation Study (JAGES),  
7  
8  
9 357 conducted by the Center for Well-being and Society, Nihon Fukushi University, as one  
10  
11  
12 358 of their research projects. We thank Jennifer Barrett, PhD, from Edanz Group  
13  
14  
15 359 (www.edanzediting.com/ac) for editing a draft of this manuscript.  
16  
17  
18 360

## 21 361 **CONTRIBUTORS**

22  
23  
24 362 TN had the idea for the study, participated in its design, performed the statistical  
25  
26  
27 363 analysis, and drafted the manuscript as the principal author. KK, the principal  
28  
29  
30 364 investigator of the JAGES project, helped to develop the idea of the study, participated  
31  
32  
33 365 in acquiring the data and in designing the study, and critically revised the manuscript.  
34  
35  
36 366 MS helped to develop the idea of the study, participated in acquiring the data and in  
37  
38  
39 367 designing the study, and critically revised the manuscript. HN helped with the data  
40  
41  
42 368 analysis and critically revised the manuscript. SS critically revised the manuscript. All  
43  
44  
45 369 authors read and approved the final manuscript.  
46  
47

48 370

## 51 371 **FUNDING**

52  
53  
54 372 This study used data from the Japan Gerontological Evaluation Study (JAGES), which  
55  
56  
57 373 was supported by the Ministry of Education, Culture, Sports, Science and Technology of  
58  
59  
60

1  
2  
3  
4  
5  
6  
7 374 Japan's Supported Program for the Strategic Research Foundation at Private  
8  
9 375 Universities (2009–2013), the Japan Society for the Promotion of Science KAKENHI  
10  
11  
12 376 (Grant Numbers JP18390200, JP22330172, JP22390400, JP23243070, JP23590786,  
13  
14  
15 377 JP23790710, JP24390469, JP24530698, JP24683018, JP25253052, JP25870573,  
16  
17  
18 378 JP25870881, JP26285138, JP26882010, JP15H01972), Health Labour Sciences  
19  
20  
21 379 Research Grants (H22-Choju-Shitei-008, H24-Junkanki [Seishu]-Ippan-007, H24-  
22  
23  
24 380 Chikyukibo-Ippan-009, H24-Choju-Wakate-009, H25-Kenki-Wakate-015, H25-Choju-  
25  
26  
27 381 Ippan-003, H26-Irryo-Shitei-003 [Fukkou], H26-Choju-Ippan-006, H27-Ninchisyou-  
28  
29  
30 382 Ippan-001), Research and Development 37 Grants for Longevity Science from the Japan  
31  
32  
33 383 Agency for Medical Research and Development (AMED), the Personal Health Record  
34  
35  
36 384 (PHR) Utilization Project from AMED, Research Funding for Longevity Sciences from  
37  
38  
39 385 the National Center for Geriatrics and Gerontology (24-17, 24-23, 29-42), and the World  
40  
41  
42 386 Health Organization Centre for Health Development (WHO Kobe Centre) (WHO APW  
43  
44  
45 387 2017/713981). This work was supported by a grant from Nihon Fukushi University  
46  
47  
48 388 Research Institute for Health Sciences. The views and opinions expressed in this article  
49  
50  
51 389 are those of the authors and do not necessarily reflect the official policy or position of the  
52  
53  
54 390 funding organizations.

55  
56  
57 391  
58  
59  
60

1  
2  
3  
4  
5  
6 392 **ETHICS APPROCAL**

7  
8  
9 393 The ethics committee at Nihon Fukushi University approved the protocol and informed  
10  
11  
12 394 consent procedure for the present study (No. 10-05).

13  
14  
15 395

16  
17  
18 396 **DATA SHARING**

19  
20  
21 397 No additional data are available.

22  
23  
24 398

25  
26  
27 399 **DATA AVAILABILITY STATEMENT**

28  
29  
30 400 The data are from the JAGES study. All enquiries are to be addressed at the data  
31  
32  
33 401 management committee via e-mail: dataadmin.ml@jages.net. All JAGES datasets have  
34  
35  
36 402 ethical or legal restrictions for public deposition because of the inclusion of sensitive  
37  
38  
39 403 information about the human participants.

40  
41  
42 404

43  
44  
45 405 **COMPERING INTERESTS**

46  
47  
48 406 None declared.

49  
50  
51 407

52  
53  
54 408 **REFERENCES**

55  
56  
57 409 1 WHO. World Population Aging. New York: United Nations 2015.



- 1  
2  
3  
4  
5  
6 410 2 International UaH. *Aging in the Twenty-first Century: A Celebration and a Challenge*.  
7  
8  
9 411 New York: UNFPA and HelpAge International 2012.  
10  
11  
12 412 3 Ministry of Health, Labour and Welfare. *Kaigo Hoken Jigyo Jyokyo Hokoku*. Tokyo,  
13  
14  
15 413 Japan: Ministry of Health, Labour and Welfare 2010.  
16  
17  
18 414 4 Keeler E, Guralnik JM, Tian H, et al. The impact of functional status on life expectancy  
19  
20  
21 415 in older persons. *J Gerontol A Biol Sci Med Sci* 2010;65A:727–33.  
22  
23  
24 416 5 Putnam, RD. *Making Democracy Work: Civic Traditions in Modern Italy*. Princeton,  
25  
26  
27 417 NJ, USA: Princeton University Press 1993.  
28  
29  
30 418 6 De Silva MJ, McKenzie K, Harpham T, et al. Social capital and mental illness: a  
31  
32  
33 419 systematic review. *J Epidemiol Community Health* 2005;59:619–27.  
34  
35  
36 420 7 Murayama H, Fujiwara Y, Kawachi I. Social capital and health: a review of prospective  
37  
38  
39 421 multilevel studies. *J Epidemiol* 2012;22:179–87.  
40  
41  
42 422 8 Story WT. Social capital and health in the least developed countries: a critical review  
43  
44  
45 423 of the literature and implications for a future research agenda. *Glob Public Health*  
46  
47  
48 424 2013;8:983–99.  
49  
50  
51 425 9 Nyqvist F, Forsman AK, Giuntoli G, et al. Social capital as a resource for mental well-  
52  
53  
54 426 being in older people: a systematic review. *Aging Ment Health* 2013;17:394–410.  
55  
56  
57 427 10 McPherson KE, Kerr S, Morgan A, et al. The association between family and  
58  
59  
60

- 1  
2  
3  
4  
5  
6 428 community social capital and health risk behaviours in young people: an integrative  
7  
8  
9 429 review. *BMC Public Health* 2013;13:971.  
10  
11  
12 430 11 Nyqvist F, Pape B, Pellfolk T, et al. Structural and cognitive aspects of social capital  
13  
14  
15 431 and all-cause mortality: a meta-analysis of cohort studies. *Soc Indic Res* 2014;116:545–  
16  
17  
18 432 66.  
19  
20  
21 433 12 Choi M, Mesa-Frias M, Nuesch E, et al. Social capital, mortality, cardiovascular  
22  
23  
24 434 events and cancer: a systematic review of prospective studies. *Int J Epidemiol*  
25  
26  
27 435 2014;43:1895–1920.  
28  
29  
30 436 13 Kawachi I, Subramanian SV, Kim D. Social capital and health: a decade of progress  
31  
32  
33 437 and beyond. In: Kawachi I, Subramanian SV, Kim D, eds. *Social Capital and Health*.  
34  
35  
36 438 New York: Springer 2008:1–26.  
37  
38  
39 439 14 Wen M, Cagney KA, Christakis NA. Effect of specific aspects of community social  
40  
41  
42 440 environment on the mortality of individuals diagnosed with serious illness. *Soc Sci Med*  
43  
44  
45 441 2005;61:1119–34.  
46  
47  
48 442 15 Mohan J, Twigg L, Barnard S, et al. Social capital, geography and health: a small-  
49  
50  
51 443 area analysis for England. *Soc Sci Med* 2005;60:1267–83.  
52  
53  
54 444 16 Snelgrove JW, Pikhart H, Stafford M. A multilevel analysis of social capital and self-  
55  
56  
57 445 rated health: evidence from the British Household Panel Survey. *Soc Sci Med*  
58  
59  
60

- 1  
2  
3  
4  
5  
6 446 2009;68:1993–2001.  
7  
8  
9 447 17 Oksanen T, Kouvonen A, Kivimäki M, et al. Social capital at work as a predictor of  
10  
11  
12 448 employee health: multilevel evidence from work units in Finland. *Soc Sci Med*  
13  
14  
15 449 2008;66:637–49.  
16  
17  
18 450 18 Desai RA, Dausey DJ, Rosenheck RA. Mental health service delivery and suicide risk:  
19  
20  
21 451 the role of individual patient and facility factors. *Am J Psychiatry* 2005;162:311–18.  
22  
23  
24 452 19 Haseda M, Kondo N, Takagi D, et al. Community social capital and inequality in  
25  
26  
27 453 depressive symptoms among older Japanese adults: a multilevel study. *Health Place*  
28  
29  
30 454 2018;52:8–17.  
31  
32  
33 455 20 Yamaguchi M, Inoue Y, Shinozaki T, Saito M, Takagi D, Kondo K, Kondo N.  
34  
35  
36 456 Community social capital and depressive symptoms among older people in Japan: a  
37  
38  
39 457 multilevel longitudinal study. *J Epidemiol* (In press).  
40  
41  
42 458 21 Koyama S, Aida J, Saito M, et al. Community social capital and tooth loss in Japanese  
43  
44  
45 459 older people: a longitudinal cohort study. *BMJ Open* 2016;6:e010768.  
46  
47  
48 460 22 Aida J, Kondo K, Kawachi I, et al. Does social capital affect the incidence of functional  
49  
50  
51 461 disability in older Japanese? A prospective population-based cohort study. *J Epidemiol*  
52  
53  
54 462 *Community Health* 2013;67:42–7.  
55  
56  
57 463 23 Imamura H, Hamano T, Michikawa T, et al. Relationships of community and  
58  
59  
60

- 1  
2  
3  
4  
5  
6 464 individual level social capital with activities of daily living and death by gender. *Int J*  
7  
8  
9 465 *Environ Res Public Health* 2016;13:860.  
10  
11  
12 466 24 Harpham T, Grant E, Thomas E. Measuring social capital within health surveys: key  
13  
14  
15 467 issues. *Health Policy Plan* 2002;17:106–11.  
16  
17  
18 468 25 Baum FE, Ziersch AM. Social capital. *J Epidemiol Community Health* 2003;57:320–  
19  
20  
21 469 3.  
22  
23  
24 470 26 Saito M, Kondo N, Aida J, et al. Development of an instrument for community-level  
25  
26  
27 471 health related social capital among Japanese older people: the JAGES Project. *J*  
28  
29  
30 472 *Epidemiol* 2017;27:221–7.  
31  
32  
33 473 27 Kondo K. Progress in aging epidemiology in Japan: the JAGES Project. *J Epidemiol*  
34  
35  
36 474 2016;26:331–6.  
37  
38  
39 475 28 Tsutsui T, Muramatsu N. Care-needs certification in the long-term care insurance  
40  
41  
42 476 system of Japan. *J Am Geriatr Soc* 2005;53:522–7.  
43  
44  
45 477 29 Ministry of Health, Labour and Welfare. Long-term care, health and welfare  
46  
47  
48 478 services for the elderly. [http://www.mhlw.go.jp/english/policy/care-welfare/care-welfare-](http://www.mhlw.go.jp/english/policy/care-welfare/care-welfare-elderly/index.html)  
49  
50  
51 479 [elderly/index.html](http://www.mhlw.go.jp/english/policy/care-welfare/care-welfare-elderly/index.html). Accessed 11 Nov 2018.  
52  
53  
54 480 30 Matsuyama Y, Aida J, Watt RG, et al. Dental status and compression of life  
55  
56  
57 481 expectancy with disability. *J Dent Res* 2017;96:1006–13.  
58  
59  
60

- 1  
2  
3  
4  
5  
6 482 31 Koyano W, Shibata H, Nakazato K, et al. Measurement of competence: reliability and  
7  
8  
9 483 validity of the TMIG Index of Competence. *Arch Gerontol Geriatr* 1991;13:103–16.  
10  
11  
12 484 32 Yesavage JA, Brink TL, Rose TL, et al. Development and validation of a geriatric  
13  
14  
15 485 depression screening scale: a preliminary report. *J Psychiatr Res* 1982;17:37–49.  
16  
17  
18 486 33 Thabut G, Christie JD, Kremers WK, et al. Survival differences following lung  
19  
20  
21 487 transplantation among US transplant centers. *JAMA* 2010;304:53–60.  
22  
23  
24 488 34 Kawachi I. Commentary: social capital and health: making the connections one step  
25  
26  
27 489 at a time. *Int J Epidemiol* 2006;35:989–93.  
28  
29  
30 490 35 Cramm JM, Nieboer AP. Social cohesion and belonging predict the well-being of  
31  
32  
33 491 community-dwelling older people. *BMC Geriatr* 2015;15:30.  
34  
35  
36 492 36 Cramm JM, van Dijk HM, Nieboer AP. The importance of neighborhood social  
37  
38  
39 493 cohesion and social capital for the well being of older adults in the community. *Tijdschr*  
40  
41  
42 494 *Gerontol Geriatr* 2013;44:50–8.  
43  
44  
45 495 37 Honjo K, Tani Y, Saito M, et al. Living alone or with others and depressive symptoms,  
46  
47  
48 496 and effect modification by residential social cohesion among older adults in Japan: the  
49  
50  
51 497 JAGES Longitudinal Study. *J Epidemiol* 2018;28:315–22.  
52  
53  
54 498 38 Suzuki E, Takao S, Subramanian SV, et al. Work-based social networks and health  
55  
56  
57 499 status among Japanese employees. *J Epidemiol Community Health* 2009;63:692–6.  
58  
59  
60

- 1  
2  
3  
4  
5  
6 500 39 Oksanen T, Virtanen M. Health and retirement: a complex relationship. *Eur J Ageing*  
7  
8  
9 501 2012;9:221–5.  
10  
11  
12 502 40 Heitmann BL. Social desirability bias in dietary self-report may compromise the  
13  
14  
15 503 validity of dietary intake measures: implications for diet disease relationships. *Int J*  
16  
17  
18 504 *Epidemiol* 1996;25:222–5.  
19  
20  
21  
22  
23  
24  
25  
26  
27  
28  
29  
30  
31  
32  
33  
34  
35  
36  
37  
38  
39  
40  
41  
42  
43  
44  
45  
46  
47  
48  
49  
50  
51  
52  
53  
54  
55  
56  
57  
58  
59  
60

STROBE Statement—Checklist of items that should be included in reports of *cohort studies*

|                              | Item No | Recommendation                                                                                                                                                                                                                                                                                                         | Page No                          |
|------------------------------|---------|------------------------------------------------------------------------------------------------------------------------------------------------------------------------------------------------------------------------------------------------------------------------------------------------------------------------|----------------------------------|
| <b>Title and abstract</b>    | 1       | (a) Indicate the study's design with a commonly used term in the title or the abstract<br>(b) Provide in the abstract an informative and balanced summary of what was done and what was found                                                                                                                          | 1<br>2-3                         |
| <b>Introduction</b>          |         |                                                                                                                                                                                                                                                                                                                        |                                  |
| Background/rationale         | 2       | Explain the scientific background and rationale for the investigation being reported                                                                                                                                                                                                                                   | 4-6                              |
| Objectives                   | 3       | State specific objectives, including any prespecified hypotheses                                                                                                                                                                                                                                                       | 6                                |
| <b>Methods</b>               |         |                                                                                                                                                                                                                                                                                                                        |                                  |
| Study design                 | 4       | Present key elements of study design early in the paper                                                                                                                                                                                                                                                                | 6                                |
| Setting                      | 5       | Describe the setting, locations, and relevant dates, including periods of recruitment, exposure, follow-up, and data collection                                                                                                                                                                                        | 6-7                              |
| Participants                 | 6       | (a) Give the eligibility criteria, and the sources and methods of selection of participants. Describe methods of follow-up<br>(b) For matched studies, give matching criteria and number of exposed and unexposed                                                                                                      | 6-7<br>non                       |
| Variables                    | 7       | Clearly define all outcomes, exposures, predictors, potential confounders, and effect modifiers. Give diagnostic criteria, if applicable                                                                                                                                                                               | 7-11                             |
| Data sources/<br>measurement | 8*      | For each variable of interest, give sources of data and details of methods of assessment (measurement). Describe comparability of assessment methods if there is more than one group                                                                                                                                   | 7-11                             |
| Bias                         | 9       | Describe any efforts to address potential sources of bias                                                                                                                                                                                                                                                              | 6-7                              |
| Study size                   | 10      | Explain how the study size was arrived at                                                                                                                                                                                                                                                                              | 7                                |
| Quantitative variables       | 11      | Explain how quantitative variables were handled in the analyses. If applicable, describe which groupings were chosen and why                                                                                                                                                                                           | 8-10                             |
| Statistical methods          | 12      | (a) Describe all statistical methods, including those used to control for confounding<br>(b) Describe any methods used to examine subgroups and interactions<br>(c) Explain how missing data were addressed<br>(d) If applicable, explain how loss to follow-up was addressed<br>(e) Describe any sensitivity analyses | 12-13<br>non<br>13<br>non<br>non |
| <b>Results</b>               |         |                                                                                                                                                                                                                                                                                                                        |                                  |
| Participants                 | 13*     | (a) Report numbers of individuals at each stage of study—eg numbers potentially eligible, examined for eligibility, confirmed eligible, included in the study, completing follow-up, and analysed<br>(b) Give reasons for non-participation at each stage<br>(c) Consider use of a flow diagram                        | 14<br>non<br>non                 |
| Descriptive data             | 14*     | (a) Give characteristics of study participants (eg demographic, clinical, social) and information on exposures and potential confounders<br>(b) Indicate number of participants with missing data for each variable of interest<br>(c) Summarise follow-up time (eg, average and total amount)                         | 14-18<br>16-18<br>14             |
| Outcome data                 | 15*     | Report numbers of outcome events or summary measures over time                                                                                                                                                                                                                                                         | 14                               |

|    |                          |    |                                                                                                                                                                                                              |       |
|----|--------------------------|----|--------------------------------------------------------------------------------------------------------------------------------------------------------------------------------------------------------------|-------|
| 1  | Main results             | 16 | (a) Give unadjusted estimates and, if applicable, confounder-adjusted estimates and their precision (eg, 95% confidence interval). Make clear which confounders were adjusted for and why they were included | 19-23 |
| 2  |                          |    | (b) Report category boundaries when continuous variables were categorized                                                                                                                                    | non   |
| 3  |                          |    | (c) If relevant, consider translating estimates of relative risk into absolute risk for a meaningful time period                                                                                             | non   |
| 4  |                          |    |                                                                                                                                                                                                              |       |
| 5  | Other analyses           | 17 | Report other analyses done—eg analyses of subgroups and interactions, and sensitivity analyses                                                                                                               | non   |
| 6  |                          |    |                                                                                                                                                                                                              |       |
| 7  |                          |    |                                                                                                                                                                                                              |       |
| 8  |                          |    |                                                                                                                                                                                                              |       |
| 9  |                          |    |                                                                                                                                                                                                              |       |
| 10 |                          |    |                                                                                                                                                                                                              |       |
| 11 | <b>Discussion</b>        |    |                                                                                                                                                                                                              |       |
| 12 | Key results              | 18 | Summarise key results with reference to study objectives                                                                                                                                                     | 24    |
| 13 | Limitations              | 19 | Discuss limitations of the study, taking into account sources of potential bias or imprecision. Discuss both direction and magnitude of any potential bias                                                   | 26-27 |
| 14 | Interpretation           | 20 | Give a cautious overall interpretation of results considering objectives, limitations, multiplicity of analyses, results from similar studies, and other relevant evidence                                   | 24-26 |
| 15 | Generalisability         | 21 | Discuss the generalisability (external validity) of the study results                                                                                                                                        | 25    |
| 16 |                          |    |                                                                                                                                                                                                              |       |
| 17 | <b>Other information</b> |    |                                                                                                                                                                                                              |       |
| 18 | Funding                  | 22 | Give the source of funding and the role of the funders for the present study and, if applicable, for the original study on which the present article is based                                                | 28-29 |
| 19 |                          |    |                                                                                                                                                                                                              |       |
| 20 |                          |    |                                                                                                                                                                                                              |       |
| 21 |                          |    |                                                                                                                                                                                                              |       |
| 22 |                          |    |                                                                                                                                                                                                              |       |
| 23 |                          |    |                                                                                                                                                                                                              |       |
| 24 |                          |    |                                                                                                                                                                                                              |       |
| 25 |                          |    |                                                                                                                                                                                                              |       |

\*Give information separately for exposed and unexposed groups.

**Note:** An Explanation and Elaboration article discusses each checklist item and gives methodological background and published examples of transparent reporting. The STROBE checklist is best used in conjunction with this article (freely available on the Web sites of PLoS Medicine at <http://www.plosmedicine.org/>, Annals of Internal Medicine at <http://www.annals.org/>, and Epidemiology at <http://www.epidem.com/>). Information on the STROBE Initiative is available at <http://www.strobe-statement.org>.



# BMJ Open

## Community social capital and the onset of functional disability among older adults in Japan: A multilevel longitudinal study using Japan Gerontological Evaluation Study (JAGES) data

|                                 |                                                                                                                                                                                                                                                                                                                                                                                                                                                                                                                                                                     |
|---------------------------------|---------------------------------------------------------------------------------------------------------------------------------------------------------------------------------------------------------------------------------------------------------------------------------------------------------------------------------------------------------------------------------------------------------------------------------------------------------------------------------------------------------------------------------------------------------------------|
| Journal:                        | <i>BMJ Open</i>                                                                                                                                                                                                                                                                                                                                                                                                                                                                                                                                                     |
| Manuscript ID                   | bmjopen-2019-029279.R1                                                                                                                                                                                                                                                                                                                                                                                                                                                                                                                                              |
| Article Type:                   | Research                                                                                                                                                                                                                                                                                                                                                                                                                                                                                                                                                            |
| Date Submitted by the Author:   | 25-Jun-2019                                                                                                                                                                                                                                                                                                                                                                                                                                                                                                                                                         |
| Complete List of Authors:       | Noguchi, Taiji; Nagoya City University, Department of Public Health; National Center for Geriatrics and Gerontology, Center for Gerontology and Social Science<br>Kondo, Katsunori; Chiba University, Center for Preventive Medical Science; National Center for Geriatrics and Gerontology, Center for Gerontology and Social Science<br>Saito, Masashige; Nihonfukushi University, Faculty of Social Welfare<br>Nakagawa-Senda, Hiroko; Nagoya City University, Department of Public Health<br>Suzuki, Sadao; Nagoya City University, Department of Public Helath |
| <b>Primary Subject Heading</b>: | Epidemiology                                                                                                                                                                                                                                                                                                                                                                                                                                                                                                                                                        |
| Secondary Subject Heading:      | Public health, Geriatric medicine                                                                                                                                                                                                                                                                                                                                                                                                                                                                                                                                   |
| Keywords:                       | PUBLIC HEALTH, EPIDEMIOLOGY, GERIATRIC MEDICINE, SOCIAL MEDICINE                                                                                                                                                                                                                                                                                                                                                                                                                                                                                                    |
|                                 |                                                                                                                                                                                                                                                                                                                                                                                                                                                                                                                                                                     |

SCHOLARONE™  
Manuscripts

1  
2  
3  
4  
5  
6  
7 1 **Community social capital and the onset of functional disability among older adults in**  
8  
9 2 **Japan: A multilevel longitudinal study using Japan Gerontological Evaluation Study**  
10  
11  
12 3 **(JAGES) data**  
13  
14

15 4  
16  
17  
18 5 Taiji Noguchi<sup>1,2</sup>, Katsunori Kondo<sup>2,3</sup>, Masashige Saito<sup>4</sup>, Hiroko Nakagawa-Senda<sup>1</sup>, Sadao  
19  
20

21 6 Suzuki<sup>1</sup>  
22  
23

24 7  
25  
26

27 8 **Author affiliations**  
28

29  
30 9 <sup>1</sup>Department of Public Health, Nagoya City University Graduate School of Medical  
31  
32 10 Sciences, Aichi, Japan  
33

34  
35  
36 11 <sup>2</sup>Center for Gerontology and Social Science, National Center for Geriatrics and  
37  
38 12 Gerontology, Aichi, Japan  
39

40  
41  
42 13 <sup>3</sup>Center for Preventive Medical Sciences, Chiba University, Chiba, Japan  
43  
44

45 14 <sup>4</sup>Department of Social Welfare, Nihon Fukushi University, Aichi, Japan  
46  
47

48 15  
49  
50

51 16 **Corresponding author:**  
52

53  
54 17 Sadao Suzuki, MD, PhD  
55

56  
57 18 Department of Public Health  
58  
59  
60

1  
2  
3  
4  
5  
6  
7 19 Nagoya City University Graduate School of Medical Sciences

8  
9 20 1 Kawasumi, Mizuho-cho, Mizuho-ku, Nagoya, Aichi 467-8601, Japan

10  
11  
12 21 e-mail: ssuzuki@med.nagoya-cu.ac.jp

13  
14  
15 22 Tel: +81-52-853-8176, +81-52-853-8177

16  
17  
18 23 Fax : +81-52-842-3830

19  
20  
21  
22 24

23  
24 25 **Abstract (255 words)**

25  
26  
27 26 **Objective:**

28  
29  
30 27 The present study examined the association between community social capital and the  
31  
32  
33 28 onset of functional disability among older Japanese people by using validated indicators  
34  
35  
36 29 of social capital and a prospective multilevel design.

37  
38  
39 30 **Design:**

40  
41  
42 31 Prospective cohort study

43  
44  
45 32 **Setting:**

46  
47  
48 33 We utilized data from the Japan Gerontological Evaluation Study (JAGES), established  
49  
50  
51 34 from August 2010 to January 2012 in 323 districts.

52  
53  
54 35 **Participants:**

55  
56  
57 36 The target population was restricted to non-institutionalized people aged 65 years or  
58  
59  
60

1  
2  
3  
4  
5  
6 37 older who were independent in activities of daily living. Participants included 73,021  
7  
8  
9 38 people (34,051 men and 38,970 women) who were followed up over a 3-year period.

10  
11  
12 39 **Primary outcome measure:**

13  
14  
15 40 The primary outcome measure was the onset of functional disability, defined as a new  
16  
17  
18 41 registration in public long-term care insurance (LTCI) system records with a care-needs  
19  
20  
21 42 level of two or above, analysed with multilevel Cox proportional hazards regression  
22  
23  
24 43 models by community social capital (civic participation, social cohesion, and reciprocity).

25  
26  
27 44 **Results:**

28  
29  
30 45 The mean age of participants was 73.3 years (SD = 6.0) for men and 73.8 years (SD =  
31  
32  
33 46 6.2) for women. During the study period, the onset of functional disability occurred in  
34  
35  
36 47 1465 (4.3%) men and 1519 (3.9%) women. Of three community social capital variables,  
37  
38  
39 48 social cohesion significantly reduced the risk of onset of functional disability (hazard  
40  
41  
42 49 ratio = 0.910; 95% CI: 0.830–0.998) among men, after adjusting for individual social and  
43  
44  
45 50 behavioral variables. There was no significant effect among women.

46  
47  
48 51 **Conclusions:**

49  
50  
51 52 Living in a community with rich social cohesion is associated with a lower incidence of  
52  
53  
54 53 onset of functional disability among older Japanese men.

55  
56  
57 54  
58  
59  
60

## 55 **Strengths and limitations of this study**

- 56 · This is the first prospective cohort study to examine the association between  
57 community social capital and the onset of functional disability among older people,  
58 by a large, nationwide population-based Japanese sample.
- 59 · To measure community social capital, an indicator consisting of validated  
60 multidimensional items was used, and we assessed three components of community  
61 social capital (civic participation, social cohesion, and reciprocity).
- 62 · Multilevel survival analysis was used to examine community contextual  
63 characteristics for the onset of functional disability.
- 64 · More than 73,000 people aged 65 years or older participated and were followed up  
65 for 3 years period.
- 66 · While this study was a large sample size, the measurements were self-reported data.

67  
68 **Word count: 3,465 words**

## 70 **INTRODUCTION**

71 In almost every country, the proportion of older people is growing at an increasing  
72 rate,[1] and Japan has displayed the fastest growth. In 2012, 32% of the Japanese

1  
2  
3  
4  
5  
6 73 population was aged over 60 years, and this is expected to rise to 42% by 2050.[2] Age-  
7  
8  
9 74 related functional disability, defined as difficulty performing activities of daily living, is  
10  
11  
12 75 a very important public health issue worldwide.[3, 4] Because functional disability  
13  
14  
15 76 affects health status and the costs of long-term care,[4] the prevention of functional  
16  
17  
18 77 disability among older people is increasingly important.

21 78         Recently, there have been great efforts to research the effect of social capital on  
22  
23  
24 79 health.[5-13] Putnam defines social capital as “features of social organization, such trust,  
25  
26  
27 80 norms and networks that can improve the efficiency of society by facilitating coordinated  
28  
29  
30 81 actions.”[5] There is considerable evidence of associations between social capital and  
31  
32  
33 82 various health indicators.[6-12] Although both ecologic and individual-level studies of  
34  
35  
36 83 social capital have yielded important insight, an appropriate examination of social  
37  
38  
39 84 capital as a collective (and contextual) influence on health requires multilevel  
40  
41  
42 85 analysis.[13] Prospective study designs are useful for establishing a valid relationship  
43  
44  
45 86 between social capital and health.[7] Several multilevel prospective studies have  
46  
47  
48 87 suggested contextual effects of social capital on health outcomes, mortality,[14, 15] self-  
49  
50  
51 88 rated health,[16, 17] suicide,[18] depression,[19, 20] and oral health.[21] Although two  
52  
53  
54 89 studies have reported an association between community social capital and the incidence  
55  
56  
57 90 of onset of functional disability among older people,[22, 23] evidence remains insufficient.

1  
2  
3  
4  
5  
6  
7 91 The study areas in this previous work were limited to certain parts of Japan, which limits  
8  
9 92 the generalization of the results. Additionally, these studies' measures of community  
10  
11  
12 93 social capital might not provide a full picture of social capital because the scales used  
13  
14  
15 94 might fail to capture the multiple dimensions of social capital, such as its cognitive and  
16  
17  
18 95 structural aspects. [24, 25]  
19

20  
21 96 In the present study, we sought to examine the association between community  
22  
23  
24 97 social capital and the onset of functional disability among older people, using a  
25  
26  
27 98 prospective multilevel design and analyzing data from a nationwide survey in Japan. We  
28  
29  
30 99 measured community social capital using an indicator consisting of recently developed  
31  
32  
33 100 and validated multidimensional items.[26]  
34

35  
36 101

## 37 38 39 102 **METHODS**

### 40 41 42 103 **Study population**

43  
44  
45 104 We utilized the Japan Gerontological Evaluation Study (JAGES) 2010–2013 cohort  
46  
47  
48 105 data.[27] Baseline data were collected using a self-administered questionnaire survey  
49  
50  
51 106 conducted from August 2010 to January 2012 among 85,161 people aged  $\geq 65$  years. The  
52  
53  
54 107 sample was restricted to people who did not already have functional disabilities, where  
55  
56  
57 108 functional disability was defined as being certified as eligible to receive long-term public  
58  
59  
60

1  
2  
3  
4  
5  
6 109 care insurance (LTCI) system services. A simple random sample was obtained from the  
7  
8  
9 110 official residence registers in 13 large municipalities, and a complete census was taken  
10  
11  
12 111 of older residents residing in the remaining 11 smaller municipalities (response rate =  
13  
14  
15 112 66.3%).

16  
17  
18 113 Survey data from 81,980 respondents who provided information for  
19  
20  
21 114 identification by the public LTCI system were linked to the public LTCI records dataset  
22  
23  
24 115 over a 3-year follow-up period beginning April 1, 2010. We excluded 4,549 respondents  
25  
26  
27 116 from 123 community areas with < 50 respondents to avoid non-precise values from small  
28  
29  
30 117 sample sizes,[26] 253 respondents with unknown areas of residence, 1,599 respondents  
31  
32  
33 118 who did not apply for public LTCI certification despite having basic activities of daily  
34  
35  
36 119 living (BADL) limitations, and, to avoid the problem of reverse causation, 2,558  
37  
38  
39 120 respondents who did not complete the BADL items. Finally, we used data from 73,021  
40  
41  
42 121 respondents in 323 community areas (figure 1).

43  
44  
45 122

## 46 47 48 123 **Measurements**

### 49 50 51 124 **Outcome**

52  
53  
54 125 We collected information on the onset of functional disability from municipality-  
55  
56  
57 126 administered public LTCI records. The public LTCI system classifies frail older adults  
58  
59  
60



1  
2  
3  
4  
5  
6 127 into seven levels (“support need levels” 1 and 2 and “care need levels” 1–5; larger  
7  
8  
9 128 numbers indicate more severe need) using a nationally standardized and validated  
10  
11  
12 129 algorithm. This level is determined according to older adults’ physical and mental care  
13  
14  
15 130 needs, regardless of informal care received,[28] and it is assessed both through computer-  
16  
17  
18 131 based and home-visit interviews with a trained health care professional and through  
19  
20  
21 132 examinations conducted by a primary physician.[29] In the computer-based assessment,  
22  
23  
24 133 time needed for care is calculated according to nine categories of care needs, including  
25  
26  
27 134 five BADL domains (bathing, eating, toileting, dressing, and transferring), assistance  
28  
29  
30 135 with instrumental activities of daily living (IADL), behavioral problems, rehabilitation,  
31  
32  
33 136 and medical services.[28] In our study, the onset of functional disability was defined as  
34  
35  
36 137 a new registration in the public LTCI records with a care-needs level of two or above,  
37  
38  
39 138 which requires at least 50 minutes of care daily and generally corresponds to needing  
40  
41  
42 139 any type of BADL care.[29] We used this outcome measurement because it has been  
43  
44  
45 140 found to reflect healthy life expectancy.[30]

46  
47  
48 141

49  
50  
51 142 Community social capital

52  
53  
54 143 To measure community social capital, individual-level baseline data were aggregated for  
55  
56  
57 144 each of the 323 local districts. We assessed three components of community social capital  
58  
59  
60

1  
2  
3  
4  
5  
6 145 (community civic participation, social cohesion, and reciprocity), based on the instrument  
7  
8  
9 146 Saito et al. developed and validated for measuring health-related community social  
10  
11  
12 147 capital.[26] Briefly, the community level was defined as the school district, a measure of  
13  
14  
15 148 community social capital was generated using factor analysis, and the factor scores for  
16  
17  
18 149 each small district were used as community social capital variables.[22, 26] Level of  
19  
20  
21 150 community civic participation was assessed by summing the percentages of participation  
22  
23  
24 151 in volunteer, sports, and hobby groups in each community. Level of community social  
25  
26  
27 152 cohesion was measured by summing the percentages answering “very” or “moderately”  
28  
29  
30 153 (with possible response categories of “very,” “moderately,” “neutral” “disagree a little,”  
31  
32  
33 154 and “disagree”) to three items: trust (“Do you think people living in your area can be  
34  
35  
36 155 trusted, in general?”), perception of others’ intention to help (“Do you think people living  
37  
38  
39 156 in your area try to help others in most situations?”), and attachment to the residential  
40  
41  
42 157 area (“How attached are you to the area where you live?”). Level of community reciprocity  
43  
44  
45 158 was measured by summing the percentages answering “yes” to three items: receives  
46  
47  
48 159 emotional support (“Do you have someone who listens to your concerns and complaints?”),  
49  
50  
51 160 provides emotional support (“Do you listen to someone’s concerns and complaints?”), and  
52  
53  
54 161 receives instrumental support (“Do you have someone who looks after you when you are  
55  
56  
57 162 sick and confined to a bed for a few days?”). Community civic participation, social  
58  
59  
60

1  
2  
3  
4  
5  
6 163 cohesion, and reciprocity scores were standardized (subtracted from the mean and  
7  
8  
9 164 divided by the standard deviation). We applied school districts as the community unit  
10  
11  
12 165 because this was the smallest feasible area unit identifiable in the JAGES data. School  
13  
14  
15 166 districts are likely to represent former ‘villages,’ which existed before repeated  
16  
17  
18 167 municipality mergers took place in the last few decades in Japan. Civic activities are  
19  
20  
21 168 often conducted within each school district, and older people can easily travel on foot or  
22  
23  
24 169 by bicycle within the school district where they live.  
25  
26

27 170

28  
29  
30 171 Individual responses on community social capital indicators

31  
32  
33 172 The individual-level social components used, which are closely related to the components  
34  
35  
36 173 of community social capital, were group participation in the community, perception of  
37  
38  
39 174 community social capital, social support, and social isolation. Group participation in the  
40  
41  
42 175 community was measured as a count of participation in the following types of groups:  
43  
44  
45 176 volunteer, sports, or hobby groups. Perception of community social cohesion was  
46  
47  
48 177 measured as a count of a study participant’s responses of “very” or “moderately” to the  
49  
50  
51 178 following items: trust, perception of others’ intention to help, and attachment to the  
52  
53  
54 179 residential area. Social support was measured as a count of the number of the following  
55  
56  
57 180 types of social support each participant had: received emotional support, provided  
58  
59  
60

1  
2  
3  
4  
5  
6 181 emotional support, and received instrumental support. Social isolation was measured  
7  
8  
9 182 using the frequency of meeting with friends: A few times per year or less was considered  
10  
11  
12 183 moderate isolation, and more than once per month was considered non-isolation.  
13  
14

15 184

16  
17  
18 185 Covariates

19  
20  
21 186 Sociodemographic characteristics and baseline health status were included in the  
22  
23  
24 187 analysis as covariates. These variables were age, equivalized income, educational  
25  
26  
27 188 attainment, marital status, self-rated health, self-reported body mass index (BMI), IADL,  
28  
29  
30 189 present illness, depression, lifestyle (smoking history, alcohol consumption, frequency of  
31  
32  
33 190 going outside), and individual social components. Age was categorized as 65–69, 70–74,  
34  
35  
36 191 75–79, 80–84, or 85 years or older. Educational attainment was categorized as < 6, 6–9,  
37  
38  
39 192 10–12, or  $\geq 13$  years. Euivalized income was calculated by dividing the income of each  
40  
41  
42 193 household by the square root of the household size (number of family members); these  
43  
44  
45 194 figures were then categorized as low (< 1,990,000 JPY; 120 JPY = 1 USD), middle  
46  
47  
48 195 (2,000,000–3,990,000 JPY), or high ( $\geq 4,000,000$  JPY). We used this index as a measure  
49  
50  
51 196 of household economic status because it adjusts for household size. Marital status was  
52  
53  
54 197 categorized married, separated/divorced, or never married. Living arrangement was  
55  
56  
57 198 categorized as living with others or living alone. Self-rated health was measured using  
58  
59  
60

1  
2  
3  
4  
5  
6 199 a single question: “What is your current health status?” with response options of  
7  
8  
9 200 “excellent,” “good,” “fair,” and “poor.” BMI was categorized as  $< 18.5$ ,  $18.5\text{--}24.9$ , or  $\geq 25$ .  
10  
11  
12 201 IADL was assessed using a five-item subscale of the Tokyo Metropolitan Institute of  
13  
14  
15 202 Gerontology Higher Competence Scale.[31] We categorized those who had difficulty with  
16  
17  
18 203 at least one item as “with difficulty”; others were categorized as “without difficulty.”  
19  
20  
21 204 Present illness was measured using the following yes/no question: “Do you receive  
22  
23  
24 205 treatment now?” Depression was assessed using the 15-item Japanese version of the  
25  
26  
27 206 Geriatric Depression Scale (GDS),[32] with scores categorized as no depression (0–4  
28  
29  
30 207 points), depressive tendency (5–9 points), or depression ( $\geq 10$  points). Smoking history  
31  
32  
33 208 was categorized as non-smoking, quit before 5 years, quit within 4 years, or currently  
34  
35  
36 209 smoking. Alcohol consumption was categorized as never, past drinker, or current drinker.  
37  
38  
39 210 Frequency of going outside was categorized as almost every day, one to three times per  
40  
41  
42 211 week, or once or twice per month or less. Urbanization based on population density was  
43  
44  
45 212 categorized as urban ( $\geq 1500$  people/km<sup>2</sup>), suburban (1000–1500 people/ km<sup>2</sup>), or rural ( $<$   
46  
47  
48 213 1000 people/ km<sup>2</sup>).

51 214

## 54 215 **Statistical analysis**

57 216 The data included 73,021 individuals (first level) nested in 323 local districts (second

1  
2  
3  
4  
5  
6 217 level). The median number of subjects in each local district was 90 (25th and 75th  
7  
8  
9 218 percentile: 63 and 317). The multilevel analysis framework assumes that individual  
10  
11  
12 219 health outcomes are partly dependent on the districts where individuals live. Multilevel  
13  
14  
15 220 models estimate the variation in outcomes across districts (random effects) and the  
16  
17  
18 221 effects of community-level variables on the outcome, adjusting for individual  
19  
20  
21 222 compositional characteristics (fixed effects). Multilevel survival analysis using Cox  
22  
23  
24 223 proportional hazards regression models with stratification by sex was applied to  
25  
26  
27 224 calculate the hazard ratio (HR) and 95% confidence interval (95% CI) for functional  
28  
29  
30 225 disability during the follow-up period. HRs were estimated for a 1 SD change in the  
31  
32  
33 226 percentages of community social capital variables. We used the following analysis models.  
34  
35  
36 227 First, the null model was used to assess whether the onset of functional disability varied  
37  
38  
39 228 across districts. Then, the effect of community social capital on the onset of functional  
40  
41  
42 229 disability was investigated, adjusting for age, educational attainment, equivalized  
43  
44  
45 230 income, marital status, living arrangements, BMI, self-rated health, present illness,  
46  
47  
48 231 IADL, alcohol consumption, smoking history, and urbanization (Model 1). GDS score and  
49  
50  
51 232 frequency of going outside were then included (Model 2). The final model also included  
52  
53  
54 233 social isolation, group participation in the community, social perception of community  
55  
56  
57 234 social capital, and social support (Model 3). Because there was frequently missing data  
58  
59  
60

1  
2  
3  
4  
5  
6 235 on the covariates, a “missing” category was created for the analyses. The significance  
7  
8  
9 236 level was set at  $p < 0.05$ . We used R (Version 3.4.3 for Windows) for all of the statistical  
10  
11  
12 237 analyses. Random effects models were estimated using the “coxme” function (coxme  
13  
14  
15 238 package).[33]

16  
17  
18 239

#### 20 21 240 **Ethical issues**

22  
23  
24 241 JAGES respondents were informed that participation in the study was voluntary and  
25  
26  
27 242 that completing and returning the self-administered questionnaire by mail indicated  
28  
29  
30 243 their consent to participate in the study. The ethics committee at Nihon Fukushi  
31  
32  
33 244 University approved the protocol and informed consent procedure for the present study  
34  
35  
36 245 (No. 10-05). This study conformed to the principles embodied in the Declaration of  
37  
38  
39 246 Helsinki.

40  
41  
42 247

#### 43 44 45 248 **Patient and public involvement**

46  
47  
48 249 No patients were involved in the development of the research question, study design or  
49  
50  
51 250 data interpretation in this study.

52  
53  
54 251

## 55 56 57 252 **RESULTS**

1  
2  
3  
4  
5  
6 253 Of the 73,021 respondents over the follow-up period (average = 2.7 years), 34,051 were  
7  
8  
9 254 men and 38,970 were women. The average age was 73.3 years (SD = 6.0) for men and  
10  
11  
12 255 73.8 years (SD = 6.2) for women. During the follow-up period, 1465 (4.3%) new cases of  
13  
14  
15 256 functional disability occurred among men; among women, there were 1519 (3.9%) new  
16  
17  
18 257 cases of functional disability.  
19

20  
21 258 Table 1 shows the descriptive characteristics of the respondents at baseline.  
22  
23  
24 259 Respondents with onset of functional disability were more likely to be older,  
25  
26  
27 260 separated/divorced, presently ill, current or former drinkers, moderately socially isolated,  
28  
29  
30 261 and living in rural areas, and to have lower educational attainment, lower equivalized  
31  
32  
33 262 income, lower BMI, poor self-rated health, depression, IADL difficulties, lower frequency  
34  
35  
36 263 of going outside, no community group participation, and lower social support. These  
37  
38  
39 264 tendencies were almost identical for men and women.  
40  
41  
42  
43  
44  
45  
46  
47  
48  
49  
50  
51  
52  
53  
54  
55  
56  
57  
58  
59  
60



265 **Table 1. Respondent characteristics**

|                                   | Men (n=34051) |      |                                      | Women (n=38970) |      |                                      |
|-----------------------------------|---------------|------|--------------------------------------|-----------------|------|--------------------------------------|
|                                   | n             | %    | Incidence rate per 1000 person-years | n               | %    | Incidence rate per 1000 person-years |
| <b>Age (years)</b>                |               |      |                                      |                 |      |                                      |
| 65-69                             | 11352         | 34.8 | 4.7                                  | 12018           | 32.1 | 2.7                                  |
| 70-74                             | 9751          | 29.9 | 9.9                                  | 10993           | 29.4 | 5.6                                  |
| 75-79                             | 7272          | 22.3 | 21.1                                 | 8570            | 22.9 | 14.7                                 |
| 80-84                             | 4045          | 12.4 | 33.8                                 | 5006            | 13.4 | 34.7                                 |
| 85 or older                       | 1631          | 5.0  | 79.4                                 | 2383            | 6.4  | 79.1                                 |
| <b>Educational attainment</b>     |               |      |                                      |                 |      |                                      |
| <6                                | 497           | 1.5  | 48.5                                 | 1211            | 3.1  | 59.4                                 |
| 6-9                               | 14523         | 42.7 | 18.3                                 | 18903           | 48.5 | 14.0                                 |
| 10-12                             | 10517         | 30.9 | 11.9                                 | 12272           | 31.5 | 10.4                                 |
| ≥13                               | 6844          | 20.1 | 12.6                                 | 4332            | 11.1 | 9.7                                  |
| Other or missing                  | 1670          | 4.9  | 28.7                                 | 2252            | 5.8  | 25.6                                 |
| <b>Equivalized income</b>         |               |      |                                      |                 |      |                                      |
| Low                               | 22521         | 69.1 | 14.7                                 | 22708           | 60.6 | 12.6                                 |
| Middle                            | 5653          | 17.3 | 13.0                                 | 5495            | 14.7 | 11.5                                 |
| High                              | 925           | 2.8  | 10.3                                 | 832             | 2.2  | 13.5                                 |
| Missing                           | 4952          | 15.2 | 27.1                                 | 9935            | 26.5 | 20.1                                 |
| <b>Marital status</b>             |               |      |                                      |                 |      |                                      |
| Married                           | 28361         | 87.0 | 14.4                                 | 21903           | 58.5 | 8.6                                  |
| Separated/divorced                | 3571          | 11.0 | 26.6                                 | 14132           | 37.7 | 22.0                                 |
| Never married                     | 444           | 1.4  | 9.8                                  | 815             | 2.2  | 20.9                                 |
| Other or missing                  | 1675          | 5.1  | 25.7                                 | 2120            | 5.7  | 21.8                                 |
| <b>Living arrangements</b>        |               |      |                                      |                 |      |                                      |
| Living with other                 | 30211         | 92.7 | 15.3                                 | 31306           | 83.6 | 13.6                                 |
| Living alone                      | 2287          | 7.0  | 19.1                                 | 6041            | 16.1 | 17.0                                 |
| Missing                           | 1553          | 4.8  | 27.5                                 | 1623            | 4.3  | 19.7                                 |
| <b>Body mass index</b>            |               |      |                                      |                 |      |                                      |
| <18.5                             | 1798          | 5.5  | 38.9                                 | 3098            | 8.3  | 26.0                                 |
| 18.5-24.9                         | 22990         | 70.6 | 14.1                                 | 24947           | 66.6 | 11.7                                 |
| ≥25.0                             | 7199          | 22.1 | 11.5                                 | 7896            | 21.1 | 11.7                                 |
| Missing                           | 2064          | 6.3  | 36.4                                 | 3029            | 8.1  | 32.6                                 |
| <b>Self-rated health</b>          |               |      |                                      |                 |      |                                      |
| Excellent                         | 4208          | 12.4 | 6.8                                  | 4173            | 10.7 | 6.3                                  |
| Good                              | 22743         | 66.8 | 11.8                                 | 27015           | 69.3 | 11.3                                 |
| Fair                              | 5778          | 17.0 | 33.3                                 | 6351            | 16.3 | 27.7                                 |
| Poor                              | 1021          | 3.0  | 57.9                                 | 878             | 2.3  | 49.9                                 |
| Missing                           | 301           | 0.9  | 26.7                                 | 553             | 1.4  | 22.3                                 |
| <b>Present illness</b>            |               |      |                                      |                 |      |                                      |
| No                                | 8391          | 25.8 | 9.7                                  | 8454            | 22.6 | 9.5                                  |
| Yes                               | 23171         | 71.1 | 17.8                                 | 26981           | 72.0 | 15.5                                 |
| Missing                           | 2489          | 7.6  | 22.4                                 | 3535            | 9.4  | 17.9                                 |
| <b>Geriatric Depression Scale</b> |               |      |                                      |                 |      |                                      |
| No depression                     | 21055         | 64.6 | 11.2                                 | 22164           | 59.2 | 10.1                                 |

|    |                                                |       |      |      |       |      |      |
|----|------------------------------------------------|-------|------|------|-------|------|------|
| 1  |                                                |       |      |      |       |      |      |
| 2  |                                                |       |      |      |       |      |      |
| 3  | Depressive tendency                            | 6063  | 18.6 | 22.3 | 6491  | 17.3 | 19.9 |
| 4  | Depression                                     | 2013  | 6.2  | 29.3 | 2083  | 5.6  | 29.2 |
| 5  | Missing                                        | 4920  | 15.1 | 24.7 | 8232  | 22.0 | 18.1 |
| 6  |                                                |       |      |      |       |      |      |
| 7  | <b>Instrumental activities of daily living</b> |       |      |      |       |      |      |
| 8  | Without difficulty                             | 22452 | 68.9 | 10.8 | 31079 | 83.0 | 7.8  |
| 9  | With difficulty                                | 8996  | 27.6 | 27.4 | 5188  | 13.9 | 49.5 |
| 10 | Missing                                        | 2603  | 8.0  | 23.8 | 2703  | 7.2  | 25.2 |
| 11 |                                                |       |      |      |       |      |      |
| 12 | <b>Alcohol consumption</b>                     |       |      |      |       |      |      |
| 13 | Never                                          | 18187 | 53.4 | 11.6 | 5405  | 13.9 | 7.8  |
| 14 | Past                                           | 2022  | 5.9  | 27.2 | 366   | 0.9  | 21.5 |
| 15 | Current                                        | 11710 | 34.4 | 20.5 | 30709 | 78.8 | 15.1 |
| 16 | Missing                                        | 2132  | 6.3  | 20.6 | 2490  | 6.4  | 18.4 |
| 17 |                                                |       |      |      |       |      |      |
| 18 | <b>Smoking history</b>                         |       |      |      |       |      |      |
| 19 | Non-smoking                                    | 8191  | 25.1 | 14.4 | 31089 | 83.0 | 13.6 |
| 20 | Non-smoking now, quit before 5                 |       |      |      |       |      |      |
| 21 | years                                          | 13967 | 42.9 | 16.0 | 1232  | 3.3  | 16.4 |
| 22 |                                                |       |      |      |       |      |      |
| 23 | Non-smoking now, quit within 4                 |       |      |      |       |      |      |
| 24 | years                                          | 2934  | 9.0  | 16.6 | 446   | 1.2  | 12.8 |
| 25 | Smoking                                        | 6305  | 19.3 | 16.5 | 1130  | 3.0  | 14.9 |
| 26 | Missing                                        | 2654  | 8.1  | 20.8 | 5073  | 13.5 | 18.7 |
| 27 |                                                |       |      |      |       |      |      |
| 28 | <b>Frequency of going outside</b>              |       |      |      |       |      |      |
| 29 | Once to twice a month or less                  | 1905  | 5.6  | 48.5 | 2758  | 7.1  | 40.8 |
| 30 | One to three times a week                      | 10397 | 30.5 | 19.7 | 16099 | 41.3 | 16.2 |
| 31 | Almost everyday                                | 19632 | 57.7 | 10.6 | 17799 | 45.7 | 8.1  |
| 32 | Missing                                        | 2117  | 6.2  | 22.8 | 2314  | 5.9  | 20.1 |
| 33 |                                                |       |      |      |       |      |      |
| 34 | <b>Social isolation</b>                        |       |      |      |       |      |      |
| 35 | Non-isolation                                  | 21650 | 66.4 | 12.7 | 29475 | 78.7 | 11.8 |
| 36 | Moderately isolation                           | 10038 | 30.8 | 20.7 | 6261  | 16.7 | 21.4 |
| 37 | Missing                                        | 2363  | 7.3  | 28.6 | 3234  | 8.6  | 25.1 |
| 38 |                                                |       |      |      |       |      |      |
| 39 | <b>Group participation in the</b>              |       |      |      |       |      |      |
| 40 | <b>community</b>                               |       |      |      |       |      |      |
| 41 | Non                                            | 16011 | 47.0 | 18.3 | 14364 | 36.9 | 19.7 |
| 42 | One                                            | 5562  | 16.3 | 9.3  | 6376  | 16.4 | 6.8  |
| 43 | Over two                                       | 5180  | 15.2 | 7.9  | 6412  | 16.5 | 5.4  |
| 44 | Missing                                        | 7298  | 21.4 | 22.8 | 11818 | 30.3 | 17.1 |
| 45 |                                                |       |      |      |       |      |      |
| 46 | <b>Social support</b>                          |       |      |      |       |      |      |
| 47 | Non                                            | 617   | 1.8  | 17.0 | 305   | 0.8  | 21.3 |
| 48 | One                                            | 1260  | 3.7  | 17.8 | 690   | 1.8  | 21.3 |
| 49 | Over two                                       | 30004 | 88.1 | 15.3 | 35523 | 91.2 | 13.4 |
| 50 | Missing                                        | 2170  | 6.4  | 26.7 | 2452  | 6.3  | 25.5 |
| 51 |                                                |       |      |      |       |      |      |
| 52 | <b>Perception of community social</b>          |       |      |      |       |      |      |
| 53 | <b>cohesion</b>                                |       |      |      |       |      |      |
| 54 | Non                                            | 3312  | 9.7  | 18.4 | 4345  | 11.1 | 14.3 |
| 55 | One                                            | 5001  | 14.7 | 13.7 | 6205  | 15.9 | 12.1 |
| 56 | Over two                                       | 23560 | 69.2 | 15.1 | 25592 | 65.7 | 14.1 |
| 57 | Missing                                        | 2178  | 6.4  | 29.5 | 2828  | 7.3  | 22.1 |
| 58 |                                                |       |      |      |       |      |      |
| 59 | <b>Urbanization</b>                            |       |      |      |       |      |      |
| 60 |                                                |       |      |      |       |      |      |

|   |          |       |      |      |       |      |
|---|----------|-------|------|------|-------|------|
| 1 |          |       |      |      |       |      |
| 2 |          |       |      |      |       |      |
| 3 | Rural    | 10594 | 32.5 | 18.0 | 13169 | 35.2 |
| 4 |          |       |      |      |       |      |
| 5 | Suburban | 18560 | 57.0 | 15.8 | 20278 | 54.1 |
| 6 | Urban    | 4897  | 15.0 | 11.9 | 5523  | 14.7 |
| 7 | <hr/>    |       |      |      |       |      |

8 266  
9  
10  
11  
12  
13  
14  
15  
16  
17  
18  
19  
20  
21  
22  
23  
24  
25  
26  
27  
28  
29  
30  
31  
32  
33  
34  
35  
36  
37  
38  
39  
40  
41  
42  
43  
44  
45  
46  
47  
48  
49  
50  
51  
52  
53  
54  
55  
56  
57  
58  
59  
60

For peer review only

1  
2  
3  
4  
5  
6 267 Tables 2 and 3 show the results of multilevel the survival analyses for men and  
7  
8  
9 268 women, respectively. In the multivariable-adjusted model (Model 1), among men, a  
10  
11  
12 269 significant association was observed between community-level social capital and  
13  
14  
15 270 incidence of functional disability for “social cohesion” (HR = 0.904, 95% CI: 0.824–0.992,  
16  
17  
18 271  $p$ -value < 0.05). This association was maintained after adding individual GDS score and  
19  
20  
21 272 frequency of going outside (HR = 0.909, 95% CI: 0.829–0.996,  $p$ -value < 0.05; Model 2)  
22  
23  
24 273 and individual responses on community social capital indicators (HR = 0.910, 95% CI:  
25  
26  
27 274 0.830–0.998; Model 3). Although the associations of incidence of functional disability  
28  
29  
30 275 with community-level civic participation and with reciprocity were not statistically  
31  
32  
33 276 significant, the point estimates for these effects were in the same direction, with HRs <  
34  
35  
36 277 1.0 (civic participation: HR = 0.972, 95% CI: 0.893–1.058; reciprocity: HR = 0.920, 95%  
37  
38  
39 278 CI: 0.829–1.021; Model 3). Among women, no significant association was observed (civic  
40  
41  
42 279 participation: HR = 0.999, 95% CI: 0.918–1.087; social cohesion: HR = 0.930, 95% CI:  
43  
44  
45 280 0.847–1.020; reciprocity: HR = 1.002, 95% CI: 0.901–1.114; Model 3).  
46  
47  
48  
49  
50  
51  
52  
53  
54  
55  
56  
57  
58  
59  
60

281 **Table 2. Multilevel survival analysis of functional disability among male respondents (n = 34,051)**

|                                                                          | Model 1                  | Model 2                  | Model 3                  |
|--------------------------------------------------------------------------|--------------------------|--------------------------|--------------------------|
|                                                                          | HR (95 % CI)             | HR (95 % CI)             | HR (95 % CI)             |
| <i>Fixed effects</i>                                                     |                          |                          |                          |
| <i>Community-level variables</i>                                         |                          |                          |                          |
| <b>Community-level social capital</b>                                    |                          |                          |                          |
| Civic participation                                                      | 0.956 (0.878-1.041)      | 0.959 (0.882-1.044)      | 0.972 (0.893-1.058)      |
| Social cohesion                                                          | 0.904 (0.824-0.992) *    | 0.909 (0.829-0.996) *    | 0.910 (0.830-0.998) *    |
| Reciprocity                                                              | 0.930 (0.837-1.032)      | 0.933 (0.841-1.035)      | 0.920 (0.829-1.021)      |
| <b>Urbanization (ref: Urban)</b>                                         |                          |                          |                          |
| Suburban                                                                 | 1.238 (0.977-1.568)      | 1.230 (0.972-1.557)      | 1.241 (0.981-1.571)      |
| Rural                                                                    | 1.278 (0.986-1.655)      | 1.232 (0.951-1.596)      | 1.251 (0.967-1.620)      |
| <i>Individual-level variables</i>                                        |                          |                          |                          |
| <b>Age (ref: 65-69 years)</b>                                            |                          |                          |                          |
| 70-74                                                                    | 1.963 (1.603-2.403) **   | 1.940 (1.584-2.376) **   | 1.948 (1.591-2.387) **   |
| 75-79                                                                    | 3.624 (2.989-4.394) **   | 3.550 (2.928-4.305) **   | 3.549 (2.924-4.307) **   |
| 80-84                                                                    | 5.115 (4.189-6.246) **   | 4.876 (3.990-5.958) **   | 4.800 (3.923-5.873) **   |
| 85 or older                                                              | 11.241 (9.126-13.846) ** | 10.371 (8.407-12.795) ** | 10.011 (8.099-12.375) ** |
| <b>Educational attainment (ref: &lt;6)</b>                               |                          |                          |                          |
| 6-9                                                                      | 0.717 (0.549-0.938) *    | 0.738 (0.564-0.965) *    | 0.738 (0.564-0.966) *    |
| 10-12                                                                    | 0.682 (0.513-0.906) **   | 0.720 (0.542-0.957) *    | 0.727 (0.547-0.967) *    |
| ≥13                                                                      | 0.745 (0.554-1.000)      | 0.781 (0.581-1.050)      | 0.793 (0.590-1.067)      |
| <b>Equivalized income (ref: Low)</b>                                     |                          |                          |                          |
| Middle                                                                   | 1.234 (1.043-1.459) *    | 1.061 (0.903-1.247)      | 1.067 (0.908-1.254)      |
| High                                                                     | 0.961 (0.523-1.769)      | 1.015 (0.673-1.530)      | 1.007 (0.668-1.519)      |
| <b>Marital status (ref: Married)</b>                                     |                          |                          |                          |
| Separated/divorced                                                       | 1.028 (0.875-1.208)      | 1.218 (1.029-1.441) *    | 1.241 (1.048-1.470) *    |
| Never married                                                            | 0.962 (0.638-1.449)      | 0.907 (0.493-1.667)      | 0.929 (0.504-1.713)      |
| <b>Living arrangements (ref: Living with other)</b>                      |                          |                          |                          |
| Living alone                                                             | 1.012 (0.799-1.282)      | 1.013 (0.798-1.284)      | 1.036 (0.815-1.317)      |
| <b>Body mass index (ref: 18.5-24.9)</b>                                  |                          |                          |                          |
| <18.5                                                                    | 1.688 (1.431-1.993) **   | 1.651 (1.399-1.949) **   | 1.633 (1.383-1.927) **   |
| ≥25.0                                                                    | 0.919 (0.792-1.065)      | 0.926 (0.798-1.074)      | 0.932 (0.804-1.081)      |
| <b>Self-rated health (ref: Excellent)</b>                                |                          |                          |                          |
| Good                                                                     | 1.356 (1.068-1.722) *    | 1.289 (1.014-1.637) *    | 1.265 (0.996-1.608)      |
| Fair                                                                     | 2.831 (2.205-3.636) **   | 2.464 (1.910-3.178) **   | 2.387 (1.850-3.079) **   |
| Poor                                                                     | 4.396 (3.287-5.881) **   | 3.638 (2.699-4.903) **   | 3.515 (2.606-4.740) **   |
| <b>Present illness (ref: No)</b>                                         |                          |                          |                          |
| Yes                                                                      | 1.140 (0.978-1.327)      | 1.143 (0.981-1.331)      | 1.146 (0.983-1.334)      |
| <b>Instrumental activities of daily living (ref: Without difficulty)</b> |                          |                          |                          |
| With difficulty                                                          | 1.798 (1.606-2.013) **   | 1.654 (1.475-1.856) **   | 1.635 (1.457-1.835) **   |
| <b>Alcohol consumption (ref: Non)</b>                                    |                          |                          |                          |
| Past                                                                     | 1.089 (0.905-1.310)      | 1.074 (0.893-1.292)      | 1.055 (0.877-1.270)      |

|    |                                              |                        |                        |                        |
|----|----------------------------------------------|------------------------|------------------------|------------------------|
| 1  |                                              |                        |                        |                        |
| 2  |                                              |                        |                        |                        |
| 3  | Current                                      | 0.850 (0.757-0.954) ** | 0.866 (0.771-0.973) *  | 0.873 (0.777-0.981) *  |
| 4  | <b>Smoking history (ref: Non-</b>            |                        |                        |                        |
| 5  | <b>smoking)</b>                              |                        |                        |                        |
| 6  | Non-smoking now, quit before 5               | 1.089 (0.948-1.250)    | 1.075 (0.936-1.234)    | 1.071 (0.932-1.230)    |
| 7  | years                                        |                        |                        |                        |
| 8  | Non-smoking now, quit within 4               | 1.256 (1.021-1.545) *  | 1.237 (1.006-1.522) *  | 1.221 (0.993-1.502)    |
| 9  | years                                        |                        |                        |                        |
| 10 | Smoking                                      | 1.357 (1.153-1.598) ** | 1.320 (1.120-1.554) ** | 1.304 (1.107-1.536) ** |
| 11 |                                              |                        |                        |                        |
| 12 | <b>Geriatric Depression Scale (ref: No</b>   |                        |                        |                        |
| 13 | <b>depression)</b>                           |                        |                        |                        |
| 14 | Depression tendency                          |                        | 1.224 (1.069-1.402) ** | 1.214 (1.059-1.392) ** |
| 15 | Depression                                   |                        | 1.222 (1.011-1.477) *  | 1.236 (1.017-1.501) *  |
| 16 |                                              |                        |                        |                        |
| 17 | <b>Frequency of going outside (ref:</b>      |                        |                        |                        |
| 18 | <b>Almost everyday)</b>                      |                        |                        |                        |
| 19 | One to three times a week                    |                        | 1.237 (1.096-1.397) ** | 1.225 (1.084-1.383) ** |
| 20 | Once to twice a month or less                |                        | 1.899 (1.611-2.238) ** | 1.801 (1.524-2.128) ** |
| 21 |                                              |                        |                        |                        |
| 22 | <b>Social isolation (ref: Non-isolation)</b> |                        |                        |                        |
| 23 | Moderately isolation                         |                        |                        | 1.060 (0.939-1.196)    |
| 24 |                                              |                        |                        |                        |
| 25 | <b>Group participation in the</b>            |                        |                        |                        |
| 26 | <b>community (ref: Non)</b>                  |                        |                        |                        |
| 27 | One                                          |                        |                        | 0.778 (0.645-0.937) ** |
| 28 | Over two                                     |                        |                        | 0.725 (0.588-0.894) ** |
| 29 |                                              |                        |                        |                        |
| 30 | <b>Social support (ref: Non)</b>             |                        |                        |                        |
| 31 | One                                          |                        |                        | 0.993 (0.625-1.578)    |
| 32 | Over two                                     |                        |                        | 1.287 (0.864-1.917)    |
| 33 |                                              |                        |                        |                        |
| 34 | <b>Perception of community social</b>        |                        |                        |                        |
| 35 | <b>cohesion (ref: Non)</b>                   |                        |                        |                        |
| 36 | One                                          |                        |                        | 0.852 (0.686-1.057)    |
| 37 | Over two                                     |                        |                        | 1.020 (0.853-1.220)    |
| 38 |                                              |                        |                        |                        |
| 39 |                                              |                        |                        |                        |
| 40 |                                              |                        |                        |                        |
| 41 | <b>Random effects</b>                        |                        |                        |                        |
| 42 | <b>Community-level variance</b>              | 0.0223                 | 0.0210                 | 0.0199                 |

43 282 \* $p < 0.05$ , \*\* $p < 0.01$

44  
45 283 Values presented are HRs (hazard ratios) and 95% CIs (confidence intervals). Community-level social capital variables (civic  
46 284 participation, social cohesion, and reciprocity) are 1 SD increase estimates. Variance of the intercept in the null model = 0.0336

47  
48  
49  
50  
51  
52  
53  
54  
55  
56  
57  
58  
59  
60

285 **Table 3. Multilevel survival analysis of functional disability among female respondents (n = 38,970)**

|                                                                          | Model 1                   | Model 2                   | Model 3                   |
|--------------------------------------------------------------------------|---------------------------|---------------------------|---------------------------|
|                                                                          | HR (95% CI)               | HR (95% CI)               | HR (95% CI)               |
| <i>Fixed effects</i>                                                     |                           |                           |                           |
| <i>Community-level variables</i>                                         |                           |                           |                           |
| <b>Community-level social capital</b>                                    |                           |                           |                           |
| Civic participation                                                      | 0.986 (0.907-1.072)       | 0.987 (0.908-1.072)       | 0.999 (0.918-1.087)       |
| Social cohesion                                                          | 0.936 (0.854-1.027)       | 0.935 (0.853-1.025)       | 0.930 (0.847-1.020)       |
| Reciprocity                                                              | 1.003 (0.903-1.115)       | 1.007 (0.906-1.119)       | 1.002 (0.901-1.114)       |
| <b>Urbanization (ref: Urban)</b>                                         |                           |                           |                           |
| Suburban                                                                 | 0.977 (0.772-1.236)       | 0.968 (0.765-1.225)       | 0.978 (0.772-1.238)       |
| Rural                                                                    | 1.045 (0.809-1.351)       | 1.013 (0.784-1.309)       | 1.024 (0.792-1.324)       |
| <i>Individual-level variables</i>                                        |                           |                           |                           |
| <b>Age (ref: 65-69 years)</b>                                            |                           |                           |                           |
| 70-74                                                                    | 1.911 (1.478-2.469) **    | 1.899 (1.469-2.455) **    | 1.896 (1.466-2.451) **    |
| 75-79                                                                    | 4.174 (3.293-5.290) **    | 4.111 (3.242-5.213) **    | 4.066 (3.203-5.161) **    |
| 80-84                                                                    | 8.084 (6.371-10.257) **   | 7.915 (6.232-10.052) **   | 7.733 (6.079-9.838) **    |
| 85 or older                                                              | 14.654 (11.434-18.780) ** | 14.137 (11.016-18.143) ** | 13.749 (10.694-17.677) ** |
| <b>Educational attainment (ref: &lt;6)</b>                               |                           |                           |                           |
| 6-9                                                                      | 0.723 (0.611-0.857) **    | 0.729 (0.615-0.863) **    | 0.734 (0.620-0.870) **    |
| 10-12                                                                    | 0.679 (0.561-0.822) **    | 0.687 (0.568-0.832) **    | 0.701 (0.578-0.849) **    |
| ≥13                                                                      | 0.792 (0.617-1.015)       | 0.806 (0.629-1.034)       | 0.826 (0.643-1.059)       |
| <b>Equivalized income (ref: Low)</b>                                     |                           |                           |                           |
| Middle                                                                   | 1.037 (0.876-1.229)       | 1.062 (0.896-1.259)       | 1.063 (0.897-1.261)       |
| High                                                                     | 1.440 (0.989-2.097)       | 1.505 (1.033-2.193) *     | 1.500 (1.029-2.186) *     |
| <b>Marital status (ref: Married)</b>                                     |                           |                           |                           |
| Separated/divorced                                                       | 1.078 (0.949-1.224)       | 1.068 (0.940-1.213)       | 1.064 (0.936-1.209)       |
| Never married                                                            | 1.356 (0.983-1.870)       | 1.330 (0.964-1.834)       | 1.338 (0.969-1.848)       |
| <b>Living arrangements (ref: Living with other)</b>                      |                           |                           |                           |
| Living alone                                                             | 1.055 (0.912-1.221)       | 1.044 (0.902-1.209)       | 1.071 (0.924-1.241)       |
| <b>Body mass index (ref: 18.5-24.9)</b>                                  |                           |                           |                           |
| <18.5                                                                    | 1.423 (1.220-1.661) **    | 1.395 (1.195-1.628) **    | 1.363 (1.168-1.592) **    |
| ≥25.0                                                                    | 0.997 (0.865-1.149)       | 0.994 (0.862-1.146)       | 1.003 (0.870-1.157)       |
| <b>Self-rated health (ref: Excellent)</b>                                |                           |                           |                           |
| Good                                                                     | 1.404 (1.098-1.795) **    | 1.350 (1.054-1.727) *     | 1.333 (1.041-1.707) *     |
| Fair                                                                     | 2.354 (1.818-3.049) **    | 2.111 (1.622-2.746) **    | 2.078 (1.596-2.706) **    |
| Poor                                                                     | 3.439 (2.524-4.685) **    | 2.934 (2.138-4.027) **    | 2.856 (2.077-3.926) **    |
| <b>Present illness (ref: No)</b>                                         |                           |                           |                           |
| Yes                                                                      | 0.943 (0.811-1.097)       | 0.946 (0.813-1.101)       | 0.954 (0.820-1.111)       |
| <b>Instrumental activities of daily living (ref: Without difficulty)</b> |                           |                           |                           |
| With difficulty                                                          | 2.449 (2.167-2.767) **    | 2.287 (2.016-2.595) **    | 2.171 (1.911-2.467)       |
| <b>Alcohol consumption (ref: Non)</b>                                    |                           |                           |                           |
| Past                                                                     | 1.574 (1.005-2.467) *     | 1.550 (0.988-2.430)       | 1.624 (1.035-2.548) *     |

|    |                                              |                        |                        |                        |
|----|----------------------------------------------|------------------------|------------------------|------------------------|
| 1  |                                              |                        |                        |                        |
| 2  |                                              |                        |                        |                        |
| 3  | Current                                      | 0.915 (0.751-1.116)    | 0.936 (0.767-1.141)    | 0.949 (0.778-1.157)    |
| 4  | <b>Smoking history (ref: Non-</b>            |                        |                        |                        |
| 5  | <b>smoking)</b>                              |                        |                        |                        |
| 6  | Non-smoking now, quit before 5               | 1.490 (1.121-1.981) ** | 1.454 (1.093-1.934) *  | 1.455 (1.094-1.936) *  |
| 7  | years                                        |                        |                        |                        |
| 8  | Non-smoking now, quit within 4               | 1.289 (0.758-2.193)    | 1.291 (0.759-2.197)    | 1.250 (0.735-2.129)    |
| 9  | years                                        |                        |                        |                        |
| 10 | Smoking                                      | 1.468 (1.077-2.000) *  | 1.430 (1.048-1.949) *  | 1.400 (1.026-1.911) *  |
| 11 |                                              |                        |                        |                        |
| 12 | <b>Geriatric Depression Scale (ref: No</b>   |                        |                        |                        |
| 13 | <b>depression)</b>                           |                        |                        |                        |
| 14 | Depression tendency                          |                        | 1.232 (1.074-1.414) ** | 1.240 (1.080-1.423) ** |
| 15 | Depression                                   |                        | 1.346 (1.116-1.624) ** | 1.364 (1.127-1.651) ** |
| 16 |                                              |                        |                        |                        |
| 17 | <b>Frequency of going outside (ref:</b>      |                        |                        |                        |
| 18 | <b>Almost everyday)</b>                      |                        |                        |                        |
| 19 | One to three times a week                    |                        | 1.119 (0.985-1.272)    | 1.098 (0.965-1.249)    |
| 20 | Once to twice a month or less                |                        | 1.323 (1.120-1.563) ** | 1.257 (1.060-1.491) ** |
| 21 |                                              |                        |                        |                        |
| 22 | <b>Social isolation (ref: Non-isolation)</b> |                        |                        |                        |
| 23 | Moderately isolation                         |                        |                        | 1.116 (0.977-1.275)    |
| 24 |                                              |                        |                        |                        |
| 25 | <b>Group participation in the</b>            |                        |                        |                        |
| 26 | <b>community (ref: Non)</b>                  |                        |                        |                        |
| 27 | One                                          |                        |                        | 0.678 (0.555-0.829) ** |
| 28 | Over two                                     |                        |                        | 0.736 (0.587-0.923) ** |
| 29 |                                              |                        |                        |                        |
| 30 | <b>Social support (ref: Non)</b>             |                        |                        |                        |
| 31 | One                                          |                        |                        | 0.727 (0.408-1.295)    |
| 32 | Over two                                     |                        |                        | 1.010 (0.619-1.647)    |
| 33 |                                              |                        |                        |                        |
| 34 | <b>Perception of community social</b>        |                        |                        |                        |
| 35 | <b>cohesion (ref: Non)</b>                   |                        |                        |                        |
| 36 | One                                          |                        |                        | 0.912 (0.740-1.123)    |
| 37 | Over two                                     |                        |                        | 1.145 (0.961-1.364)    |
| 38 |                                              |                        |                        |                        |
| 39 |                                              |                        |                        |                        |
| 40 |                                              |                        |                        |                        |
| 41 | <b>Random effects</b>                        |                        |                        |                        |
| 42 | <b>Community-level variance</b>              | 0.0202                 | 0.0194                 | 0.0209                 |

43 286 \* $p < 0.05$ , \*\* $p < 0.01$

44  
45 287 Values presented are HRs (hazard ratios) and 95% CIs (confidence intervals). Community-level social capital variables (civic  
46 288 participation, social cohesion, and reciprocity) are 1 SD increase estimates. Variance of the intercept in the null model = 0.0351

47  
48  
49  
50  
51  
52  
53  
54  
55  
56  
57  
58  
59  
60



1  
2  
3  
4  
5  
6 289 **DISCUSSION**  
7  
8

9 290 To the best of our knowledge, this was the first study with a multilevel longitudinal  
10  
11  
12 291 design to examine the association between community social capital and the onset of  
13  
14  
15 292 functional disability using social capital indicators with verified validity in a large  
16  
17  
18 293 sample of older community-dwelling adults. The results suggested that living in a  
19  
20  
21 294 community with higher community social cohesion at baseline was associated with a  
22  
23  
24 295 lower future risk of functional disability, even after adjusting for individual responses  
25  
26  
27 296 on community social capital indicators. The present study indicated the importance of  
28  
29  
30 297 strategies to protect the health of older people through fostering cohesive communities  
31  
32  
33 298 with efforts such as promoting social connections and trust.  
34  
35

36 299 There are several possible pathways between community social cohesion and  
37  
38  
39 300 health. Social cohesion is determined by the resources available to members of tight-knit  
40  
41  
42 301 communities.[34] Cohesive communities might help residents to express trust toward  
43  
44  
45 302 their neighbors and to be psychologically healthier. Previous studies have revealed that  
46  
47  
48 303 neighborhood social cohesion positively affected older people's subjective well-being,[35,  
49  
50  
51 304 36] and that cohesive communities prevented the occurrence of depressive symptoms in  
52  
53  
54 305 older people who lived alone and were at high risk of functional disability.[37] Thus, we  
55  
56  
57 306 considered high levels of community social cohesion to be potentially protective against  
58  
59  
60

1  
2  
3  
4  
5  
6 307 the onset of functional disability via the positive effects on psychological health, such as  
7  
8  
9 308 enhancing subjective well-being and inhibiting depressive symptoms.

10  
11  
12 309 Two previous studies examined the association between community social  
13  
14  
15 310 capital and the onset of functional disability in older people using multilevel longitudinal  
16  
17  
18 311 designs.[23, 24] Our results suggesting that higher community social cohesion was  
19  
20  
21 312 associated with lower risk of functional disability among men but not women were  
22  
23  
24 313 inconsistent with these previous studies. There are several possible reasons for this  
25  
26  
27 314 difference. First, both previous studies were surveys in a smaller area, compared with  
28  
29  
30 315 that in our research. Because our work used survey data from municipalities nationwide,  
31  
32  
33 316 the possibility for generalizing our findings might be higher. Second, the measurement  
34  
35  
36 317 index of community social capital in the previous studies differed from ours. Both  
37  
38  
39 318 previous studies used only one item (“general trust”) to measure community social  
40  
41  
42 319 cohesion. In contrast, we used multidimensional indicators consisting of three  
43  
44  
45 320 measurement items with verified validity, which might be more accurate for examining  
46  
47  
48 321 community contextual effects. Therefore, our results might reflect more accurate  
49  
50  
51 322 estimates of the effects of community social cohesion on individual health.

52  
53  
54 323 In the present study, community social cohesion affected the onset of functional  
55  
56  
57 324 disability only among men. It is likely that, among people who are currently in the older  
58  
59  
60

1  
2  
3  
4  
5  
6 325 age groups, men sought and had stronger relationships with their colleagues before  
7  
8  
9 326 retirement than did women, given the nature of companies, particularly in Japan.[38]  
10  
11  
12 327 When this strong commitment is lost after retirement, these men may also experience a  
13  
14  
15 328 variety of changes in their living arrangements, leading to changes in their physical and  
16  
17  
18 329 mental health.[39] A cohesive community might be helpful in building new connections  
19  
20  
21 330 and encouraging social participation, which may keep men healthier and improve their  
22  
23  
24 331 psychological well-being. Honjo, et al. reported that rich social cohesion in a community  
25  
26  
27 332 buffered the risk of depression among older men living alone in Japan.[37] Thus,  
28  
29  
30 333 community cohesiveness may protect men's psychological health by helping them to  
31  
32  
33 334 build new connections in the community after retirement. However, further studies are  
34  
35  
36 335 needed to validate this hypothesis.

37  
38  
39 336 We considered urbanization (population density) a potentially confounding  
40  
41  
42 337 characteristic of living areas. In exploratory analyses, we confirmed that urbanization  
43  
44  
45 338 had a relatively strong influence as a confounding factor on the relationship between  
46  
47  
48 339 community social capital and the onset of functional disability. Therefore, the other  
49  
50  
51 340 characteristics of living area that were related to urbanization, such as public security,  
52  
53  
54 341 might have caused residual confounding. However, we believe that this influence was  
55  
56  
57 342 relatively small because we adjusted for urbanization as a representative factor of  
58  
59  
60

1  
2  
3  
4  
5  
6 343 communities.

8  
9 344 The present study had several strengths. First, using a large, nationwide  
10  
11  
12 345 population-based sample enabled us to conduct a community-level multilevel analysis to  
13  
14  
15 346 clarify the contextual relationship between community-level social capital and the onset  
16  
17  
18 347 of functional disability. Second, we used validated indicators consisting of  
19  
20  
21 348 multidimensional items to measure community social capital. Therefore, we may have  
22  
23  
24 349 appropriately captured the whole of community social capital. However, the study also  
25  
26  
27 350 had several limitations. First, because the measurement was based on a self-  
28  
29  
30 351 administered questionnaire, the results are subject to response biases such as social  
31  
32  
33 352 desirability.[40] Social desirability bias may have artificially inflated social capital,  
34  
35  
36 353 which was calculated from the responses to the questionnaire. This, in turn, may have  
37  
38  
39 354 caused an overestimation of the relationship between community social capital and the  
40  
41  
42 355 onset of functional disability. Second, especially because the response rate to the survey  
43  
44  
45 356 was moderate (66.3%), selection bias might exist. Respondents in this study tended to be  
46  
47  
48 357 younger and healthier than the typical older adult population in the surveyed  
49  
50  
51 358 municipalities. In addition, people living in communities with low social capital might  
52  
53  
54 359 have been less likely than others to respond to the survey. These factors may have  
55  
56  
57 360 reduced the generalizability of our findings. However, because the respondents were  
58  
59  
60

1  
2  
3  
4  
5  
6 361 randomly selected or completely enumerated from 24 municipalities in Japan, we believe  
7  
8  
9 362 that any effect of selection bias was small. Third, there were frequently missing data on  
10  
11  
12 363 the model variables. In the analyses, we dealt with these missing data using a “missing”  
13  
14  
15 364 category.” This approach had the potential to bias the results. Therefore, we conducted  
16  
17  
18 365 sensitivity analyses by removing the missing data (complete case analyses). These  
19  
20  
21 366 analyses confirmed that the tendencies of the results were almost the identical when the  
22  
23  
24 367 missing data were removed (data not shown). Fourth, our study included no information  
25  
26  
27 368 about changes in social capital. Therefore, it is possible that unmeasured time-varying  
28  
29  
30 369 covariates such as economic changes or natural disasters may have biased our results.  
31  
32  
33 370 Fifth, we used school district as the unit of analysis for communities because this was  
34  
35  
36 371 the smallest identifiable unit. However, the geographic scale of this unit may be slightly  
37  
38  
39 372 too large for the analysis of community-level social capital. Nevertheless, a school district  
40  
41  
42 373 represents an area of a size that older people can easily travel on foot or by bicycle, and  
43  
44  
45 374 community organizations, such as senior citizens’ clubs and sports clubs, conduct their  
46  
47  
48 375 activities within individual school districts. Therefore, school district is a meaningful  
49  
50  
51 376 and appropriate unit of analysis for communities. Further work should build on our  
52  
53  
54 377 findings by defining regional units for spatial statistical analysis, using geographic  
55  
56  
57 378 information systems, for example. Finally, although our study was a prospective cohort  
58  
59  
60

1  
2  
3  
4  
5  
6 379 study, the follow-up period was moderately short. Considering the possibility of reverse  
7  
8  
9 380 causation, study designs with a longer follow-up period are necessary in the future.

10  
11  
12 381

## 13 14 15 382 **CONCLUSION**

16  
17  
18 383 In conclusion, this multilevel prospective cohort study found that higher levels of  
19  
20  
21 384 community social cohesion were associated with a lower incidence of onset of functional  
22  
23  
24 385 disability among older men, but not among older women, even after adjusting for  
25  
26  
27 386 individual social and behavioral variables. The findings suggest the importance of  
28  
29  
30 387 fostering cohesive communities to reduce the onset functional disability among older  
31  
32  
33 388 people.

34  
35  
36 389

## 37 38 39 390 **ACKNOWLEDGMENTS**

40  
41  
42 391 This study used data from the Japan Gerontological Evaluation Study (JAGES),  
43  
44  
45 392 conducted by the Center for Well-being and Society, Nihon Fukushi University, as one  
46  
47  
48 393 of their research projects. We thank Jennifer Barrett, PhD, from Edanz Group  
49  
50  
51 394 ([www.edanzediting.com/ac](http://www.edanzediting.com/ac)) for editing a draft of this manuscript.

52  
53  
54 395

## 55 56 57 396 **CONTRIBUTORS**

1  
2  
3  
4  
5  
6 397 TN had the idea for the study, participated in its design, performed the statistical  
7  
8  
9 398 analysis, and drafted the manuscript as the principal author. KK, the principal  
10  
11  
12 399 investigator of the JAGES project, helped to develop the idea of the study, participated  
13  
14  
15 400 in acquiring the data and in designing the study, and critically revised the manuscript.  
16  
17  
18 401 MS helped to develop the idea of the study, participated in acquiring the data and in  
19  
20  
21 402 designing the study, and critically revised the manuscript. HN helped with the data  
22  
23  
24 403 analysis and critically revised the manuscript. SS critically revised the manuscript. All  
25  
26  
27 404 authors read and approved the final manuscript.  
28  
29

30  
31 405

## 32 33 406 **FUNDING**

34  
35  
36 407 This study used data from the Japan Gerontological Evaluation Study (JAGES), which  
37  
38  
39 408 was supported by the Ministry of Education, Culture, Sports, Science and Technology of  
40  
41  
42 409 Japan's Supported Program for the Strategic Research Foundation at Private  
43  
44  
45 410 Universities (2009–2013), the Japan Society for the Promotion of Science KAKENHI  
46  
47  
48 411 (Grant Numbers JP18390200, JP22330172, JP22390400, JP23243070, JP23590786,  
49  
50  
51 412 JP23790710, JP24390469, JP24530698, JP24683018, JP25253052, JP25870573,  
52  
53  
54 413 JP25870881, JP26285138, JP26882010, JP15H01972), Health Labour Sciences  
55  
56  
57 414 Research Grants (H22-Choju-Shitei-008, H24-Junkanki [Seishu]-Ippan-007, H24-

1  
2  
3  
4  
5  
6 415 Chikyukibo-Ippan-009, H24-Choju-Wakate-009, H25-Kenki-Wakate-015, H25-Choju-  
7  
8  
9 416 Ippan-003, H26-Irryo-Shitei-003 [Fukkou], H26-Choju-Ippan-006, H27-Ninchisyou-  
10  
11  
12 417 Ippan-001), the Research and Development Grants for Longevity Science from Japan  
13  
14  
15 418 Agency for Medical Research and development (AMED) (JP18dk0110027,  
16  
17  
18 419 JP18ls0110002, JP18le0110009, JP19dk0110034), Research Funding for Longevity  
19  
20  
21 420 Sciences from the National Center for Geriatrics and Gerontology (24-17, 24-23, 29-42),  
22  
23  
24 421 and the World Health Organization Centre for Health Development (WHO Kobe Centre)  
25  
26  
27 422 (WHO APW 2017/713981). This work was supported by a grant from Nihon Fukushi  
28  
29  
30 423 University Research Institute for Health Sciences. The views and opinions expressed in  
31  
32  
33 424 this article are those of the authors and do not necessarily reflect the official policy or  
34  
35  
36 425 position of the funding organizations.

37  
38  
39 426

#### 427 **ETHICS APPROCAL**

428 The ethics committee at Nihon Fukushi University approved the protocol and informed  
43  
44  
45  
46  
47  
48 429 consent procedure for the present study (No. 10-05).

49  
50  
51 430

#### 52 53 54 431 **DATA SHARING**

55  
56  
57 432 No additional data are available.  
58  
59  
60



1  
2  
3  
4  
5  
6 433  
7  
8

9 434 **COMPERING INTERESTS**

10  
11  
12 435 None declared.  
13  
14

15 436  
16  
17

18 437 **REFERENCES**

19  
20  
21 438 1 WHO. World Population Aging. New York: United Nations 2015.  
22

23  
24 439 2 International UaH. Aging in the Twenty-first Century: A Celebration and a Challenge.  
25

26  
27 440 New York: UNFPA and HelpAge International 2012.  
28

29  
30 441 3 Ministry of Health, Labour and Welfare. Kaigo Hoken Jigyo Jyokyo Hokoku. Tokyo,  
31

32  
33 442 Japan: Ministry of Health, Labour and Welfare 2010.  
34

35  
36 443 4 Keeler E, Guralnik JM, Tian H, et al. The impact of functional status on life expectancy  
37

38  
39 444 in older persons. *J Gerontol A Biol Sci Med Sci* 2010;65A:727–33.  
40

41  
42 445 5 Putnam, RD. Making Democracy Work: Civic Traditions in Modern Italy. Princeton,  
43

44  
45 446 NJ, USA: Princeton University Press 1993.  
46

47  
48 447 6 De Silva MJ, McKenzie K, Harpham T, et al. Social capital and mental illness: a  
49

50  
51 448 systematic review. *J Epidemiol Community Health* 2005;59:619–27.  
52

53  
54 449 7 Murayama H, Fujiwara Y, Kawachi I. Social capital and health: a review of prospective  
55

56  
57 450 multilevel studies. *J Epidemiol* 2012;22:179–87.  
58  
59  
60

- 1  
2  
3  
4  
5  
6 451 8 Story WT. Social capital and health in the least developed countries: a critical review  
7  
8  
9 452 of the literature and implications for a future research agenda. *Glob Public Health*  
10  
11  
12 453 2013;8:983–99.
- 14  
15 454 9 Nyqvist F, Forsman AK, Giuntoli G, et al. Social capital as a resource for mental well-  
16  
17  
18 455 being in older people: a systematic review. *Aging Ment Health* 2013;17:394–410.
- 20  
21 456 10 McPherson KE, Kerr S, Morgan A, et al. The association between family and  
22  
23  
24 457 community social capital and health risk behaviours in young people: an integrative  
25  
26  
27 458 review. *BMC Public Health* 2013;13:971.
- 29  
30 459 11 Nyqvist F, Pape B, Pellfolk T, et al. Structural and cognitive aspects of social capital  
31  
32  
33 460 and all-cause mortality: a meta-analysis of cohort studies. *Soc Indic Res* 2014;116:545–  
34  
35  
36 461 66.
- 38  
39 462 12 Choi M, Mesa-Frias M, Nuesch E, et al. Social capital, mortality, cardiovascular  
40  
41  
42 463 events and cancer: a systematic review of prospective studies. *Int J Epidemiol*  
43  
44  
45 464 2014;43:1895–1920.
- 47  
48 465 13 Kawachi I, Subramanian SV, Kim D. Social capital and health: a decade of progress  
49  
50  
51 466 and beyond. In: Kawachi I, Subramanian SV, Kim D, eds. *Social Capital and Health*.  
52  
53  
54 467 New York: Springer 2008:1–26.
- 56  
57 468 14 Wen M, Cagney KA, Christakis NA. Effect of specific aspects of community social  
58  
59  
60

- 1  
2  
3  
4  
5  
6 469 environment on the mortality of individuals diagnosed with serious illness. *Soc Sci Med*  
7  
8  
9 470 2005;61:1119–34.  
10  
11  
12 471 15 Mohan J, Twigg L, Barnard S, et al. Social capital, geography and health: a small-  
13  
14  
15 472 area analysis for England. *Soc Sci Med* 2005;60:1267–83.  
16  
17  
18 473 16 Snelgrove JW, Pikhart H, Stafford M. A multilevel analysis of social capital and self-  
19  
20  
21 474 rated health: evidence from the British Household Panel Survey. *Soc Sci Med*  
22  
23  
24 475 2009;68:1993–2001.  
25  
26  
27 476 17 Oksanen T, Kouvonen A, Kivimäki M, et al. Social capital at work as a predictor of  
28  
29  
30 477 employee health: multilevel evidence from work units in Finland. *Soc Sci Med*  
31  
32  
33 478 2008;66:637–49.  
34  
35  
36 479 18 Desai RA, Dausey DJ, Rosenheck RA. Mental health service delivery and suicide risk:  
37  
38  
39 480 the role of individual patient and facility factors. *Am J Psychiatry* 2005;162:311–18.  
40  
41  
42 481 19 Haseda M, Kondo N, Takagi D, et al. Community social capital and inequality in  
43  
44  
45 482 depressive symptoms among older Japanese adults: a multilevel study. *Health Place*  
46  
47  
48 483 2018;52:8–17.  
49  
50  
51 484 20 Yamaguchi M, Inoue Y, Shinozaki T, Saito M, Takagi D, Kondo K, Kondo N.  
52  
53  
54 485 Community social capital and depressive symptoms among older people in Japan: a  
55  
56  
57 486 multilevel longitudinal study. *J Epidemiol* (In press).

- 1  
2  
3  
4  
5  
6 487 21 Koyama S, Aida J, Saito M, et al. Community social capital and tooth loss in Japanese  
7  
8  
9 488 older people: a longitudinal cohort study. *BMJ Open* 2016;6:e010768.  
10  
11  
12 489 22 Aida J, Kondo K, Kawachi I, et al. Does social capital affect the incidence of functional  
13  
14  
15 490 disability in older Japanese? A prospective population-based cohort study. *J Epidemiol*  
16  
17  
18 491 *Community Health* 2013;67:42–7.  
19  
20  
21 492 23 Imamura H, Hamano T, Michikawa T, et al. Relationships of community and  
22  
23  
24 493 individual level social capital with activities of daily living and death by gender. *Int J*  
25  
26  
27 494 *Environ Res Public Health* 2016;13:860.  
28  
29  
30 495 24 Harpham T, Grant E, Thomas E. Measuring social capital within health surveys: key  
31  
32  
33 496 issues. *Health Policy Plan* 2002;17:106–11.  
34  
35  
36 497 25 Baum FE, Ziersch AM. Social capital. *J Epidemiol Community Health* 2003;57:320–  
37  
38  
39 498 3.  
40  
41  
42 499 26 Saito M, Kondo N, Aida J, et al. Development of an instrument for community-level  
43  
44  
45 500 health related social capital among Japanese older people: the JAGES Project. *J*  
46  
47  
48 501 *Epidemiol* 2017;27:221–7.  
49  
50  
51 502 27 Kondo K. Progress in aging epidemiology in Japan: the JAGES Project. *J Epidemiol*  
52  
53  
54 503 2016;26:331–6.  
55  
56  
57 504 28 Tsutsui T, Muramatsu N. Care-needs certification in the long-term care insurance  
58  
59  
60

- 1  
2  
3  
4  
5  
6 505 system of Japan. *J Am Geriatr Soc* 2005;53:522–7.  
7  
8  
9 506 29 Ministry of Health, Labour and Welfare. Long-term care, health and welfare  
10  
11  
12 507 services for the elderly. [http://www.mhlw.go.jp/english/policy/care-welfare/care-welfare-](http://www.mhlw.go.jp/english/policy/care-welfare/care-welfare-elderly/index.html)  
13  
14  
15 508 elderly/index.html. Accessed 11 Nov 2018.  
16  
17  
18 509 30 Matsuyama Y, Aida J, Watt RG, et al. Dental status and compression of life  
19  
20  
21 510 expectancy with disability. *J Dent Res* 2017;96:1006–13.  
22  
23  
24 511 31 Koyano W, Shibata H, Nakazato K, et al. Measurement of competence: reliability and  
25  
26  
27 512 validity of the TMIG Index of Competence. *Arch Gerontol Geriatr* 1991;13:103–16.  
28  
29  
30 513 32 Yesavage JA, Brink TL, Rose TL, et al. Development and validation of a geriatric  
31  
32  
33 514 depression screening scale: a preliminary report. *J Psychiatr Res* 1982;17:37–49.  
34  
35  
36 515 33 Thabut G, Christie JD, Kremers WK, et al. Survival differences following lung  
37  
38  
39 516 transplantation among US transplant centers. *JAMA* 2010;304:53–60.  
40  
41  
42 517 34 Kawachi I. Commentary: social capital and health: making the connections one step  
43  
44  
45 518 at a time. *Int J Epidemiol* 2006;35:989–93.  
46  
47  
48 519 35 Cramm JM, Nieboer AP. Social cohesion and belonging predict the well-being of  
49  
50  
51 520 community-dwelling older people. *BMC Geriatr* 2015;15:30.  
52  
53  
54 521 36 Cramm JM, van Dijk HM, Nieboer AP. The importance of neighborhood social  
55  
56  
57 522 cohesion and social capital for the well being of older adults in the community. *Tijdschr*

- 1  
2  
3  
4  
5  
6 523 *Gerontol Geriatr* 2013;44:50–8.  
7  
8  
9 524 37 Honjo K, Tani Y, Saito M, et al. Living alone or with others and depressive symptoms,  
10  
11  
12 525 and effect modification by residential social cohesion among older adults in Japan: the  
13  
14  
15 526 JAGES Longitudinal Study. *J Epidemiol* 2018;28:315–22.  
16  
17  
18 527 38 Suzuki E, Takao S, Subramanian SV, et al. Work-based social networks and health  
19  
20  
21 528 status among Japanese employees. *J Epidemiol Community Health* 2009;63:692–6.  
22  
23  
24 529 39 Oksanen T, Virtanen M. Health and retirement: a complex relationship. *Eur J Ageing*  
25  
26  
27 530 2012;9:221–5.  
28  
29  
30 531 40 Heitmann BL. Social desirability bias in dietary self-report may compromise the  
31  
32  
33 532 validity of dietary intake measures: implications for diet disease relationships. *Int J*  
34  
35  
36 533 *Epidemiol* 1996;25:222–5.  
37

38  
39 534

40  
41  
42 535 **FIGURE LEGENDS**

43  
44  
45 536 Figure 1. Flow chart showing participation in the study cohort, 2010 to 2013. LTCI: long-  
46  
47  
48 537 term care insurance; BADL: basic activity of daily living  
49  
50  
51  
52  
53  
54  
55  
56  
57  
58  
59  
60

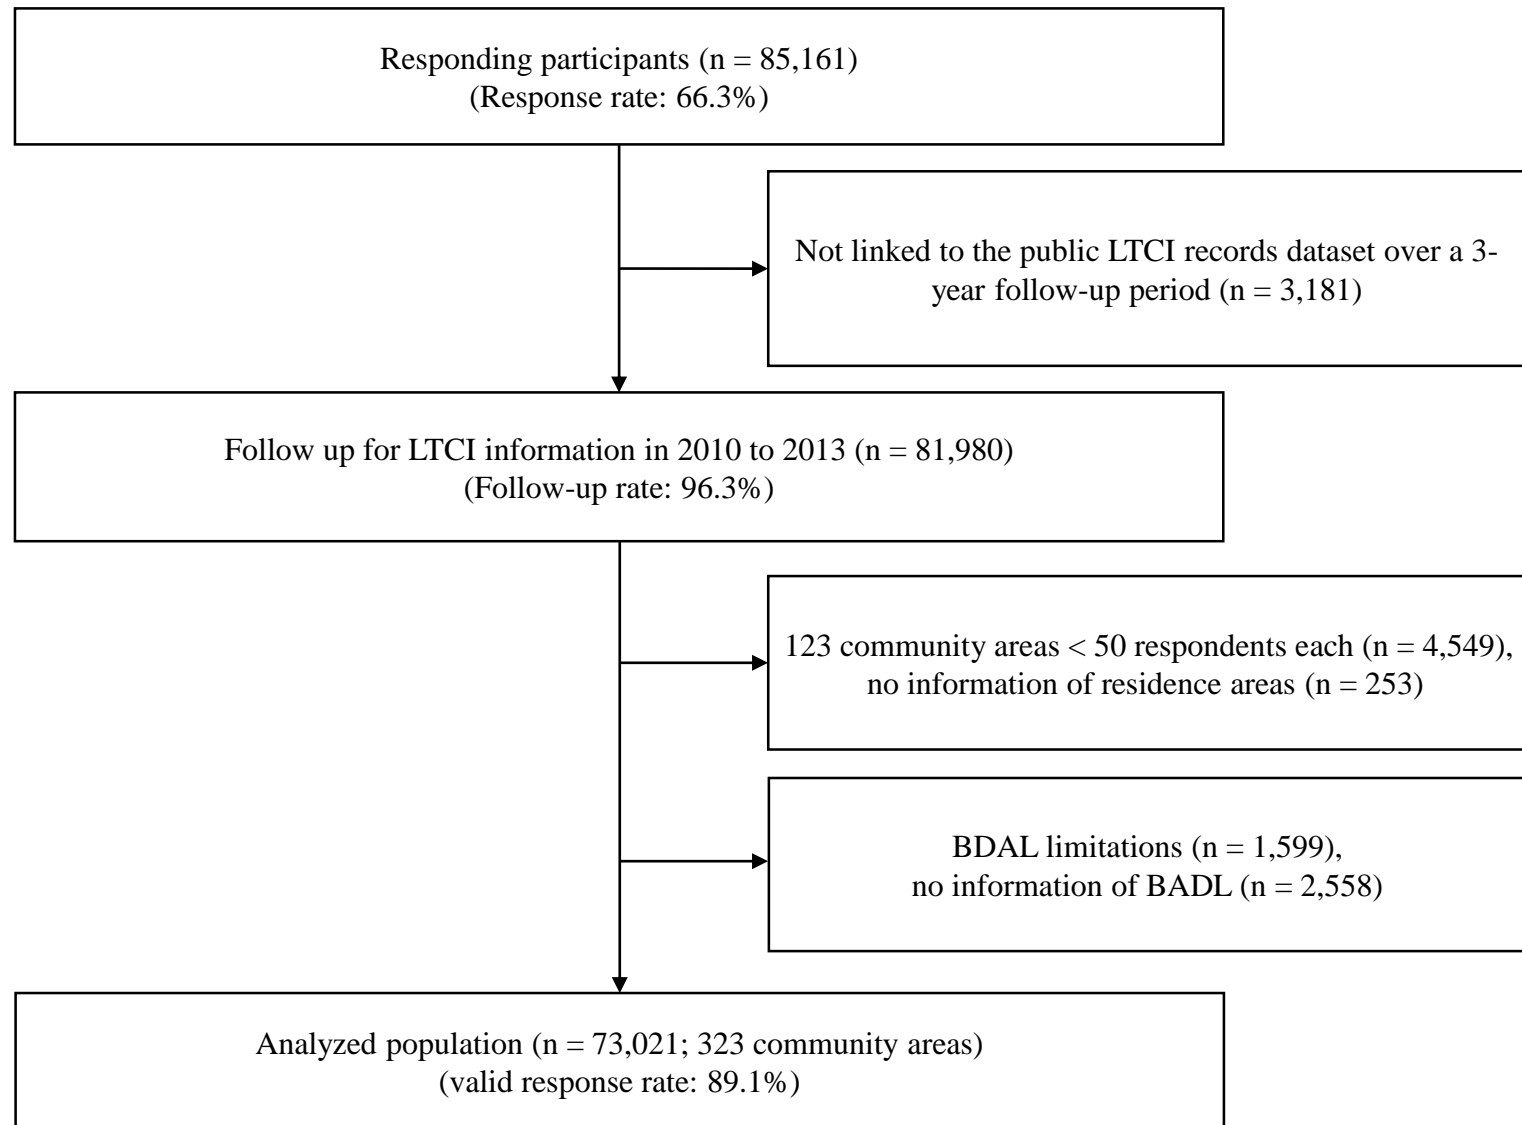

STROBE Statement—Checklist of items that should be included in reports of *cohort studies*

|                              | Item No | Recommendation                                                                                                                                                                                                                                                                                                         | Page No                             |
|------------------------------|---------|------------------------------------------------------------------------------------------------------------------------------------------------------------------------------------------------------------------------------------------------------------------------------------------------------------------------|-------------------------------------|
| <b>Title and abstract</b>    | 1       | (a) Indicate the study's design with a commonly used term in the title or the abstract<br>(b) Provide in the abstract an informative and balanced summary of what was done and what was found                                                                                                                          | 1<br>2-3                            |
| <b>Introduction</b>          |         |                                                                                                                                                                                                                                                                                                                        |                                     |
| Background/rationale         | 2       | Explain the scientific background and rationale for the investigation being reported                                                                                                                                                                                                                                   | 4-6                                 |
| Objectives                   | 3       | State specific objectives, including any prespecified hypotheses                                                                                                                                                                                                                                                       | 6                                   |
| <b>Methods</b>               |         |                                                                                                                                                                                                                                                                                                                        |                                     |
| Study design                 | 4       | Present key elements of study design early in the paper                                                                                                                                                                                                                                                                | 6                                   |
| Setting                      | 5       | Describe the setting, locations, and relevant dates, including periods of recruitment, exposure, follow-up, and data collection                                                                                                                                                                                        | 6-7                                 |
| Participants                 | 6       | (a) Give the eligibility criteria, and the sources and methods of selection of participants. Describe methods of follow-up<br>(b) For matched studies, give matching criteria and number of exposed and unexposed                                                                                                      | 6-7<br>non                          |
| Variables                    | 7       | Clearly define all outcomes, exposures, predictors, potential confounders, and effect modifiers. Give diagnostic criteria, if applicable                                                                                                                                                                               | 7-12                                |
| Data sources/<br>measurement | 8*      | For each variable of interest, give sources of data and details of methods of assessment (measurement). Describe comparability of assessment methods if there is more than one group                                                                                                                                   | 7-12                                |
| Bias                         | 9       | Describe any efforts to address potential sources of bias                                                                                                                                                                                                                                                              | 13-14                               |
| Study size                   | 10      | Explain how the study size was arrived at                                                                                                                                                                                                                                                                              | 7                                   |
| Quantitative variables       | 11      | Explain how quantitative variables were handled in the analyses. If applicable, describe which groupings were chosen and why                                                                                                                                                                                           | 8-10,<br>11-12                      |
| Statistical methods          | 12      | (a) Describe all statistical methods, including those used to control for confounding<br>(b) Describe any methods used to examine subgroups and interactions<br>(c) Explain how missing data were addressed<br>(d) If applicable, explain how loss to follow-up was addressed<br>(e) Describe any sensitivity analyses | 12-14<br>non<br>13-14<br>non<br>non |
| <b>Results</b>               |         |                                                                                                                                                                                                                                                                                                                        |                                     |
| Participants                 | 13*     | (a) Report numbers of individuals at each stage of study—eg numbers potentially eligible, examined for eligibility, confirmed eligible, included in the study, completing follow-up, and analysed<br>(b) Give reasons for non-participation at each stage<br>(c) Consider use of a flow diagram                        | 15<br>7<br>7,<br>figure<br>1        |
| Descriptive data             | 14*     | (a) Give characteristics of study participants (eg demographic, clinical, social) and information on exposures and potential confounders<br>(b) Indicate number of participants with missing data for each variable of interest<br>(c) Summarise follow-up time (eg, average and total amount)                         | 15-18<br>15-18<br>15                |
| Outcome data                 | 15*     | Report numbers of outcome events or summary measures over time                                                                                                                                                                                                                                                         | 15                                  |



|    |                          |    |                                                                                                                                                                                                              |
|----|--------------------------|----|--------------------------------------------------------------------------------------------------------------------------------------------------------------------------------------------------------------|
| 1  |                          |    |                                                                                                                                                                                                              |
| 2  |                          |    |                                                                                                                                                                                                              |
| 3  | Main results             | 16 | (a) Give unadjusted estimates and, if applicable, confounder-adjusted estimates and their precision (eg, 95% confidence interval). Make clear which confounders were adjusted for and why they were included |
| 4  |                          |    | 19-23                                                                                                                                                                                                        |
| 5  |                          |    |                                                                                                                                                                                                              |
| 6  |                          |    |                                                                                                                                                                                                              |
| 7  |                          |    | non                                                                                                                                                                                                          |
| 8  |                          |    | non                                                                                                                                                                                                          |
| 9  |                          |    |                                                                                                                                                                                                              |
| 10 | Other analyses           | 17 | Report other analyses done—eg analyses of subgroups and interactions, and sensitivity analyses                                                                                                               |
| 11 |                          |    | non                                                                                                                                                                                                          |
| 12 |                          |    |                                                                                                                                                                                                              |
| 13 | <b>Discussion</b>        |    |                                                                                                                                                                                                              |
| 14 | Key results              | 18 | Summarise key results with reference to study objectives                                                                                                                                                     |
| 15 |                          |    | 24                                                                                                                                                                                                           |
| 16 | Limitations              | 19 | Discuss limitations of the study, taking into account sources of potential bias or imprecision. Discuss both direction and magnitude of any potential bias                                                   |
| 17 |                          |    | 27-29                                                                                                                                                                                                        |
| 18 | Interpretation           | 20 | Give a cautious overall interpretation of results considering objectives, limitations, multiplicity of analyses, results from similar studies, and other relevant evidence                                   |
| 19 |                          |    | 24-27                                                                                                                                                                                                        |
| 20 | Generalisability         | 21 | Discuss the generalisability (external validity) of the study results                                                                                                                                        |
| 21 |                          |    | 25, 27                                                                                                                                                                                                       |
| 22 |                          |    |                                                                                                                                                                                                              |
| 23 | <b>Other information</b> |    |                                                                                                                                                                                                              |
| 24 | Funding                  | 22 | Give the source of funding and the role of the funders for the present study and, if applicable, for the original study on which the present article is based                                                |
| 25 |                          |    | 30-31                                                                                                                                                                                                        |
| 26 |                          |    |                                                                                                                                                                                                              |

\*Give information separately for exposed and unexposed groups.

**Note:** An Explanation and Elaboration article discusses each checklist item and gives methodological background and published examples of transparent reporting. The STROBE checklist is best used in conjunction with this article (freely available on the Web sites of PLoS Medicine at <http://www.plosmedicine.org/>, Annals of Internal Medicine at <http://www.annals.org/>, and Epidemiology at <http://www.epidem.com/>). Information on the STROBE Initiative is available at <http://www.strobe-statement.org>.
